# Supplementary material for: DFT study on activation of carbon dioxide by (tBuArN)3MN (MNb,V,Ta): the electronic structure and activity
Source: Royal Society of Chemistry journal article supplement (doi:10.1039/c0dt01021a), 2011-01-01
Supplement: c0dt01021a.pdf [file c0dt01021a.pdf]

# DFT Study on Reduction of Carbon Dioxide by $(\text{tBuArN})_3\text{M}\equiv\text{N}$ (M=Nb, V, Ta): the Electronic Structure and Catalyzing Activity

*Xingye Ren, Chongfa Xiao and Hongming Wang\**

Institute for Advanced Study, Nanchang University, Nanchang city, Jiangxi 330031,  
China

Email: [hongmingwang@ncu.edu.cn](mailto:hongmingwang@ncu.edu.cn)

---

\* Coresponding author: email: [hongmingwang@ncu.edu.cn](mailto:hongmingwang@ncu.edu.cn)

NbN1

|   |             |             |             |
|---|-------------|-------------|-------------|
| N | 0.42075700  | -0.68346300 | -3.12910800 |
| C | -1.89519100 | -1.55378900 | 0.32328000  |
| C | -1.66559500 | -2.85799200 | 0.82240600  |
| C | -2.33144700 | -0.58047700 | 1.23787200  |
| C | -1.88263500 | -3.18562600 | 2.16094800  |
| H | -1.29122300 | -3.61407400 | 0.13883400  |
| C | -2.55666900 | -0.88322200 | 2.58881800  |
| H | -2.50501800 | 0.42633300  | 0.86965400  |
| C | -2.33410800 | -2.18733700 | 3.03866200  |
| H | -2.50900800 | -2.43150300 | 4.08565200  |
| C | -0.46890600 | 2.37665500  | -0.32677700 |
| C | 0.14628900  | 2.48996600  | 0.93351200  |
| C | -1.79248700 | 2.86066000  | -0.44740200 |
| C | -0.50508200 | 3.08276000  | 2.02377100  |
| H | 1.16134100  | 2.12050500  | 1.04376100  |
| C | -2.46379400 | 3.45442000  | 0.62286400  |
| H | -2.30047000 | 2.74935500  | -1.40048100 |
| C | -1.80733000 | 3.56603300  | 1.85742800  |
| H | -2.31775700 | 4.03624900  | 2.69725500  |
| C | 2.28157100  | -0.68731900 | 0.68480300  |
| C | 1.51922600  | -0.92515200 | 1.84603900  |
| C | 3.41365300  | 0.15112000  | 0.81684400  |
| C | 1.87226000  | -0.38270900 | 3.08726900  |
| H | 0.64962700  | -1.57037800 | 1.76366100  |
| C | 3.79051800  | 0.69836100  | 2.04492100  |
| H | 3.99542600  | 0.38382300  | -0.07010300 |
| C | 3.01455700  | 0.42139100  | 3.17912600  |
| H | 3.30463800  | 0.83592700  | 4.14328600  |
| C | -2.66462100 | -1.79790200 | -2.02803100 |
| C | -2.92574500 | -0.73426200 | -3.11410200 |
| C | -2.10342500 | -3.06632300 | -2.70796800 |
| C | -4.02222700 | -2.13238600 | -1.37069800 |
| H | -3.35484400 | 0.16807900  | -2.66475000 |
| H | -1.98940400 | -0.46680900 | -3.60757900 |
| H | -3.62837000 | -1.11427900 | -3.86767300 |
| H | -1.94237400 | -3.86808200 | -1.97927000 |
| H | -2.79630800 | -3.44486400 | -3.47178400 |
| H | -1.14951400 | -2.82828300 | -3.18508100 |

|   |             |             |             |
|---|-------------|-------------|-------------|
| H | -4.73049600 | -2.45640300 | -2.14200200 |
| H | -3.94132200 | -2.93362500 | -0.63101600 |
| H | -4.44238900 | -1.25397100 | -0.86962200 |
| C | 0.61261500  | 2.71912400  | -2.53853500 |
| C | -0.40809700 | 2.66941800  | -3.69747100 |
| C | 0.76468300  | 4.17877700  | -2.05428500 |
| C | 1.98524600  | 2.26764400  | -3.07759200 |
| H | -0.51666800 | 1.63693300  | -4.03866500 |
| H | -1.38868700 | 3.04112900  | -3.38188800 |
| H | -0.07540000 | 3.28709900  | -4.54276500 |
| H | 1.47833500  | 4.24324200  | -1.22612100 |
| H | 1.13957300  | 4.79931100  | -2.87647600 |
| H | -0.18234700 | 4.60739800  | -1.71511800 |
| H | 2.30928300  | 2.91810900  | -3.90078400 |
| H | 2.73720100  | 2.31490200  | -2.28237800 |
| H | 1.92577700  | 1.24015900  | -3.44162600 |
| C | 2.86513500  | -2.19875400 | -1.21005500 |
| C | 3.68816500  | -1.49689300 | -2.31339300 |
| C | 3.82552300  | -2.85652100 | -0.19348100 |
| C | 2.04698300  | -3.33344000 | -1.86193200 |
| H | 3.00813800  | -1.04376500 | -3.03868400 |
| H | 4.32892600  | -0.71282500 | -1.89661300 |
| H | 4.33611600  | -2.21332800 | -2.83635100 |
| H | 3.26617400  | -3.33700700 | 0.61628200  |
| H | 4.42081400  | -3.62512200 | -0.70000800 |
| H | 4.51754000  | -2.14057800 | 0.25740200  |
| H | 2.71052600  | -4.04903100 | -2.36535600 |
| H | 1.47276300  | -3.87031600 | -1.09911500 |
| H | 1.35244700  | -2.92044200 | -2.59583100 |
| N | 1.89575300  | -1.26435300 | -0.54779200 |
| N | 0.22726400  | 1.79683300  | -1.41862200 |
| N | -1.69015600 | -1.22334700 | -1.04136900 |
| C | 5.01601500  | 1.58165800  | 2.14319600  |
| H | 5.14590100  | 1.97358900  | 3.15710200  |
| H | 5.92988100  | 1.03467200  | 1.87894000  |
| H | 4.94870900  | 2.43714400  | 1.46094400  |
| C | 1.04292800  | -0.68795800 | 4.31479400  |
| H | 1.45771600  | -0.20692900 | 5.20685500  |
| H | 0.00989200  | -0.34749900 | 4.18983500  |
| H | 0.99556700  | -1.76671100 | 4.50614100  |
| C | -3.07732400 | 0.18286400  | 3.52778900  |
| H | -2.53508400 | 1.12425000  | 3.39589300  |
| H | -4.13784700 | 0.39589600  | 3.33764600  |
| H | -2.98966100 | -0.12639900 | 4.57474900  |

|    |             |             |             |
|----|-------------|-------------|-------------|
| C  | -1.61466300 | -4.58527300 | 2.67026700  |
| H  | -0.80128900 | -4.59629900 | 3.40679800  |
| H  | -2.49752000 | -5.01083500 | 3.16343100  |
| H  | -1.32990000 | -5.25703600 | 1.85521700  |
| C  | -3.88766000 | 3.94344100  | 0.46809400  |
| H  | -4.59296200 | 3.30644800  | 1.01718400  |
| H  | -4.00837100 | 4.96210100  | 0.85616400  |
| H  | -4.19614900 | 3.94477000  | -0.58157700 |
| C  | 0.21518600  | 3.25421400  | 3.34346500  |
| H  | 0.69021300  | 4.24265400  | 3.41047600  |
| H  | -0.47374500 | 3.17158300  | 4.19150200  |
| H  | 1.00246600  | 2.50536700  | 3.46375800  |
| Nb | 0.19981800  | -0.33344700 | -1.46556400 |

NbN2

|   |             |             |             |
|---|-------------|-------------|-------------|
| C | -0.42271400 | 2.41382800  | -0.27562200 |
| C | -0.37000800 | 3.01025500  | -1.55627100 |
| C | -1.68494400 | 2.23590000  | 0.31122000  |
| C | -1.52352100 | 3.43238400  | -2.21637500 |
| H | 0.59651000  | 3.12177300  | -2.03612400 |
| C | -2.86157500 | 2.64600200  | -0.33429700 |
| H | -1.73517000 | 1.77518900  | 1.29293800  |
| C | -2.76838500 | 3.24563900  | -1.59175000 |
| H | -3.67585900 | 3.57300000  | -2.09736400 |
| C | -0.77288000 | -0.95088300 | 2.14077600  |
| C | -1.92139100 | -1.47684400 | 1.52683600  |
| C | -0.95194000 | -0.09957900 | 3.25219100  |
| C | -3.20750200 | -1.19287700 | 2.00698600  |
| H | -1.79328000 | -2.12916600 | 0.66844000  |
| C | -2.22192300 | 0.20286700  | 3.74788600  |
| H | -0.07398200 | 0.33768800  | 3.71706600  |
| C | -3.34463200 | -0.35432500 | 3.11725500  |
| H | -4.33954600 | -0.12898500 | 3.49908200  |
| C | -0.40669400 | -1.40218300 | -1.96308900 |
| C | -1.57685700 | -0.65720900 | -2.20819600 |
| C | -0.52403300 | -2.80267100 | -1.87767900 |
| C | -2.81897800 | -1.27645400 | -2.37865500 |
| H | -1.49152600 | 0.42255200  | -2.27771400 |
| C | -1.75302800 | -3.44786200 | -2.05620700 |
| H | 0.36444400  | -3.38648900 | -1.65796700 |
| C | -2.89223000 | -2.67463800 | -2.30899800 |

|   |             |             |             |
|---|-------------|-------------|-------------|
| H | -3.85162500 | -3.16938000 | -2.45409100 |
| C | 1.63472200  | 3.07346200  | 0.98083000  |
| C | 0.79692200  | 4.31026500  | 1.37189500  |
| C | 2.29450500  | 2.53053600  | 2.26289000  |
| C | 2.74625000  | 3.49036900  | -0.00553100 |
| H | 0.34493200  | 4.79534000  | 0.50199700  |
| H | -0.00709200 | 4.04127600  | 2.06544000  |
| H | 1.44297300  | 5.04375200  | 1.86652800  |
| H | 2.93540300  | 1.67720800  | 2.03602000  |
| H | 2.91504100  | 3.30747500  | 2.72517100  |
| H | 1.53031100  | 2.22457600  | 2.98585000  |
| H | 3.35491900  | 4.29338600  | 0.43092900  |
| H | 3.40956400  | 2.64603000  | -0.21837800 |
| H | 2.32360500  | 3.87339100  | -0.94025000 |
| C | 1.32083300  | -2.27825700 | 2.44496300  |
| C | 2.25656100  | -1.56532200 | 3.44330900  |
| C | 0.38978400  | -3.23824100 | 3.21748200  |
| C | 2.17141200  | -3.12333900 | 1.47750000  |
| H | 2.92158000  | -0.88547300 | 2.90653700  |
| H | 1.68805300  | -0.99583400 | 4.18626500  |
| H | 2.87503100  | -2.29395700 | 3.98210900  |
| H | -0.29180600 | -3.75993900 | 2.53756400  |
| H | 0.99669000  | -3.99061700 | 3.73270100  |
| H | -0.21335700 | -2.72074000 | 3.96911500  |
| H | 2.68974100  | -3.91398200 | 2.03442600  |
| H | 1.52637400  | -3.60145500 | 0.73197100  |
| H | 2.93385100  | -2.52397100 | 0.97223600  |
| C | 1.84228700  | -0.87233800 | -2.92861600 |
| C | 2.82970400  | -2.03181300 | -2.67195100 |
| C | 1.12835900  | -1.10233100 | -4.27855700 |
| C | 2.63126100  | 0.44768300  | -3.04219800 |
| H | 3.36537100  | -1.89481600 | -1.72905600 |
| H | 2.30830100  | -2.99451800 | -2.64270400 |
| H | 3.57076000  | -2.08470300 | -3.47976100 |
| H | 0.40986100  | -0.30273800 | -4.48725100 |
| H | 1.87148000  | -1.11137700 | -5.08341900 |
| H | 0.59186900  | -2.05478800 | -4.30749100 |
| H | 3.34628700  | 0.38677000  | -3.87145900 |
| H | 1.94759100  | 1.28034200  | -3.23991500 |
| H | 3.19408300  | 0.66455800  | -2.13216000 |
| N | 0.84233200  | -0.73457100 | -1.80955700 |
| N | 0.52259700  | -1.28045200 | 1.64499000  |
| N | 0.75464400  | 1.99266100  | 0.40877800  |
| C | -1.83987900 | -4.95648700 | -1.97716500 |

|    |             |             |             |
|----|-------------|-------------|-------------|
| H  | -2.87743000 | -5.30085400 | -2.03012200 |
| H  | -1.28874200 | -5.43327100 | -2.79719700 |
| H  | -1.40817000 | -5.33224600 | -1.04269100 |
| C  | -4.06366400 | -0.45694700 | -2.63854800 |
| H  | -4.63324600 | -0.85149900 | -3.48859200 |
| H  | -4.73513900 | -0.46440000 | -1.77056500 |
| H  | -3.81324300 | 0.58632500  | -2.84636900 |
| C  | -4.20066200 | 2.46645700  | 0.34505300  |
| H  | -4.31089000 | 1.45026000  | 0.73669900  |
| H  | -4.30841800 | 3.14940700  | 1.19750300  |
| H  | -5.02913800 | 2.66427000  | -0.34264800 |
| C  | -1.44534700 | 4.07239300  | -3.58504500 |
| H  | -2.03675400 | 3.51688700  | -4.32287100 |
| H  | -1.83391600 | 5.09852800  | -3.57081400 |
| H  | -0.41409100 | 4.11181600  | -3.94676300 |
| C  | -2.39115300 | 1.14057500  | 4.92306900  |
| H  | -2.75391000 | 2.12487300  | 4.60054200  |
| H  | -3.11756500 | 0.75202400  | 5.64633100  |
| H  | -1.44378200 | 1.29698700  | 5.44697700  |
| C  | -4.41968200 | -1.82877200 | 1.36251200  |
| H  | -4.66146300 | -2.79009300 | 1.83551000  |
| H  | -5.30663500 | -1.19260000 | 1.45558000  |
| H  | -4.24334900 | -2.02544000 | 0.30130100  |
| Nb | 1.19905900  | -0.02738000 | 0.11953200  |
| C  | 4.44493900  | -0.18270700 | 0.20639500  |
| N  | 2.95090700  | -0.09214300 | 0.25099700  |
| O  | 4.87100900  | -1.33661500 | 0.38499500  |
| O  | 4.99852000  | 0.90693200  | -0.02026600 |

NbNO

|   |             |             |             |
|---|-------------|-------------|-------------|
| C | -1.08366200 | 2.06011700  | 1.02077700  |
| C | -1.37344200 | 3.22281100  | 0.28046500  |
| C | -2.13978900 | 1.36599600  | 1.62369700  |
| C | -2.68078500 | 3.69427300  | 0.15428300  |
| H | -0.56080400 | 3.75467500  | -0.20123000 |
| C | -3.46328500 | 1.82089000  | 1.51463600  |
| H | -1.91862400 | 0.47110200  | 2.19565900  |
| C | -3.71681500 | 2.98138200  | 0.78006500  |
| H | -4.73898900 | 3.34538200  | 0.69512300  |
| C | -0.39816000 | -1.90063600 | 1.37742400  |
| C | -1.63546000 | -2.31175800 | 0.86002400  |

|   |             |             |             |
|---|-------------|-------------|-------------|
| C | -0.26722100 | -1.75043500 | 2.76890100  |
| C | -2.71900400 | -2.58875200 | 1.70371000  |
| H | -1.73777000 | -2.43541300 | -0.21241800 |
| C | -1.33625400 | -2.00885800 | 3.63233400  |
| H | 0.68116600  | -1.41703100 | 3.17439000  |
| C | -2.55519400 | -2.43038700 | 3.08414300  |
| H | -3.39113000 | -2.64341000 | 3.74798900  |
| C | -1.20382600 | -0.37315700 | -2.22582400 |
| C | -2.48605900 | 0.08705000  | -1.88430000 |
| C | -1.07426100 | -1.63418900 | -2.82561500 |
| C | -3.62391100 | -0.67903800 | -2.15474000 |
| H | -2.58272500 | 1.06159700  | -1.41698500 |
| C | -2.19757800 | -2.42446900 | -3.10244800 |
| H | -0.08245000 | -2.00018800 | -3.07053300 |
| C | -3.46297800 | -1.93201000 | -2.76379200 |
| H | -4.34252000 | -2.53500700 | -2.98152700 |
| C | 1.09732900  | 2.30876100  | 2.23452100  |
| C | 0.21713200  | 2.69955500  | 3.43870900  |
| C | 2.19959700  | 1.36406400  | 2.74342600  |
| C | 1.74698600  | 3.57307600  | 1.63644400  |
| H | -0.56041100 | 3.41765300  | 3.16784700  |
| H | -0.26454600 | 1.82118100  | 3.87948500  |
| H | 0.84837400  | 3.16089900  | 4.20480600  |
| H | 2.90718600  | 1.07721900  | 1.96478500  |
| H | 2.77369600  | 1.86465900  | 3.52976700  |
| H | 1.76328600  | 0.45862200  | 3.17398500  |
| H | 2.38631700  | 4.05495300  | 2.38476200  |
| H | 2.36679800  | 3.32120300  | 0.77209100  |
| H | 0.99141800  | 4.30313300  | 1.33229400  |
| C | 1.70459600  | -2.81149000 | 0.38133500  |
| C | 2.74712400  | -2.73061800 | 1.51423500  |
| C | 0.97703400  | -4.17042000 | 0.45299400  |
| C | 2.41826500  | -2.73759100 | -0.98024600 |
| H | 3.26173700  | -1.76642000 | 1.50472600  |
| H | 2.27991800  | -2.86611300 | 2.49360900  |
| H | 3.49689500  | -3.52204200 | 1.39823900  |
| H | 0.22067500  | -4.25703800 | -0.33292000 |
| H | 1.70751900  | -4.97355200 | 0.31231500  |
| H | 0.48759700  | -4.32746300 | 1.41681100  |
| H | 3.09867300  | -3.58963500 | -1.08500700 |
| H | 1.69236400  | -2.78441900 | -1.79780900 |
| H | 3.00156300  | -1.82205500 | -1.08609600 |
| C | 0.44015100  | 1.26221800  | -3.17853400 |
| C | 1.51236100  | 0.45476100  | -3.93747700 |

|    |             |             |             |
|----|-------------|-------------|-------------|
| C  | -0.71567300 | 1.59591700  | -4.14284800 |
| C  | 1.03454800  | 2.59416000  | -2.68799400 |
| H  | 2.35380100  | 0.21532900  | -3.28261500 |
| H  | 1.09819400  | -0.47982500 | -4.32706400 |
| H  | 1.89237500  | 1.03105000  | -4.78832200 |
| H  | -1.50952200 | 2.15258300  | -3.63688500 |
| H  | -0.32602500 | 2.22142000  | -4.95224500 |
| H  | -1.15595600 | 0.70231300  | -4.59138900 |
| H  | 1.42335000  | 3.16027700  | -3.54098300 |
| H  | 0.26119000  | 3.19930900  | -2.20730500 |
| H  | 1.85960600  | 2.45627200  | -1.98667300 |
| N  | -0.06229900 | 0.46511700  | -1.98585200 |
| N  | 0.71221000  | -1.67340100 | 0.49035300  |
| N  | 0.26768900  | 1.59568900  | 1.18500900  |
| C  | -2.03646700 | -3.77772200 | -3.75745400 |
| H  | -3.00199000 | -4.27189300 | -3.89587500 |
| H  | -1.56266200 | -3.68954600 | -4.74193400 |
| H  | -1.40393700 | -4.44088200 | -3.15628500 |
| C  | -5.00409900 | -0.15450700 | -1.82949800 |
| H  | -5.53277100 | 0.15424200  | -2.73988300 |
| H  | -5.62130700 | -0.91877600 | -1.34499600 |
| H  | -4.95129400 | 0.71213300  | -1.16594500 |
| C  | -4.58420700 | 1.06618000  | 2.19201900  |
| H  | -4.69161700 | 0.05785300  | 1.77759600  |
| H  | -4.39183800 | 0.94993600  | 3.26440800  |
| H  | -5.54108200 | 1.58314400  | 2.07648300  |
| C  | -2.98089500 | 4.95736600  | -0.62030300 |
| H  | -3.81772600 | 4.81337600  | -1.31226800 |
| H  | -3.25847400 | 5.77809500  | 0.05237700  |
| H  | -2.11506300 | 5.28593300  | -1.20157700 |
| C  | -1.18997600 | -1.81162700 | 5.12433900  |
| H  | -1.59807300 | -0.84298300 | 5.43881000  |
| H  | -1.72655700 | -2.58444700 | 5.68408100  |
| H  | -0.14054200 | -1.83850900 | 5.43094900  |
| C  | -4.02599200 | -3.09447600 | 1.13603800  |
| H  | -4.10507800 | -4.18389800 | 1.24232800  |
| H  | -4.88614300 | -2.65981300 | 1.65625700  |
| H  | -4.11211700 | -2.86077800 | 0.07186000  |
| Nb | 0.89436500  | 0.24268900  | -0.20115900 |
| C  | 3.88089800  | 1.10234700  | -0.76078500 |
| N  | 2.67279900  | 0.56860300  | -0.52335000 |
| O  | 4.18229500  | 2.26560500  | -0.90242300 |
| C  | 5.55328700  | -0.31889500 | 0.16181500  |
| O  | 4.90306000  | 0.10896300  | -0.95366100 |



|      |             |             |             |
|------|-------------|-------------|-------------|
| C    | 6.65863400  | -1.27980600 | -0.20029300 |
| H    | 7.36864600  | -0.79240500 | -0.87456600 |
| H    | 7.16698500  | -1.60597900 | 0.70650700  |
| H    | 6.24451300  | -2.14307200 | -0.72954700 |
| O    | 5.26420500  | 0.03596400  | 1.28231700  |
| NbN3 |             |             |             |
| C    | -0.72675700 | -1.28916000 | 1.85704800  |
| C    | -1.45907800 | -0.54596200 | 2.80042200  |
| C    | -1.35954300 | -2.36615500 | 1.22286300  |
| C    | -2.77697500 | -0.86943700 | 3.12316500  |
| H    | -0.97939900 | 0.28438100  | 3.30044500  |
| C    | -2.67890000 | -2.72657800 | 1.54211300  |
| H    | -0.81004100 | -2.93989700 | 0.48587200  |
| C    | -3.37300900 | -1.96897800 | 2.48724900  |
| H    | -4.39313800 | -2.24573400 | 2.74672200  |
| C    | -0.37177100 | -1.15048300 | -1.87622100 |
| C    | -1.75379800 | -1.05139300 | -2.07114100 |
| C    | 0.25147100  | -2.40678600 | -1.98530800 |
| C    | -2.51127700 | -2.18130000 | -2.41054600 |
| H    | -2.23353900 | -0.08554400 | -1.96632700 |
| C    | -0.48560700 | -3.54672200 | -2.31316200 |
| H    | 1.31994700  | -2.47205100 | -1.81842100 |
| C    | -1.86481300 | -3.41440600 | -2.53227800 |
| H    | -2.44592500 | -4.29324500 | -2.80468800 |
| C    | -1.10603300 | 2.32664600  | 0.00014400  |
| C    | -2.32219300 | 1.63573600  | 0.13339400  |
| C    | -1.06714400 | 3.43739400  | -0.85762500 |
| C    | -3.47432300 | 2.04432000  | -0.54539000 |
| H    | -2.36546400 | 0.78543400  | 0.80334000  |
| C    | -2.20553900 | 3.86300300  | -1.55633400 |
| H    | -0.13692500 | 3.97567500  | -0.99610000 |
| C    | -3.40232100 | 3.16037900  | -1.38936300 |
| H    | -4.29302400 | 3.48914800  | -1.92103500 |
| C    | 1.60504500  | -1.86927400 | 2.50866500  |
| C    | 1.84777500  | -3.23523900 | 1.83701200  |
| C    | 2.94732800  | -1.14921800 | 2.73192400  |
| C    | 0.98889200  | -2.10237500 | 3.90524800  |
| H    | 0.91839400  | -3.80657200 | 1.76338600  |
| H    | 2.26291800  | -3.09653600 | 0.83858300  |
| H    | 2.55247600  | -3.82528500 | 2.43428200  |
| H    | 2.80126100  | -0.19208100 | 3.23861000  |
| H    | 3.58078700  | -1.77177600 | 3.37181400  |
| H    | 3.47907900  | -0.97712900 | 1.79890900  |
| H    | 1.70550400  | -2.67251700 | 4.50494500  |

|   |             |             |             |
|---|-------------|-------------|-------------|
| H | 0.79505000  | -1.15938700 | 4.42451500  |
| H | 0.05838000  | -2.67179200 | 3.86600800  |
| C | 0.87843600  | 0.74500800  | -2.90704500 |
| C | 1.64921800  | -0.21177800 | -3.84025200 |
| C | -0.34645800 | 1.29733200  | -3.66353200 |
| C | 1.81950400  | 1.89599500  | -2.52007900 |
| H | 2.55569400  | -0.58468000 | -3.36120700 |
| H | 1.03327600  | -1.05296800 | -4.16639900 |
| H | 1.95083200  | 0.34613900  | -4.73307000 |
| H | -0.94641900 | 1.95310900  | -3.03106900 |
| H | 0.00623600  | 1.87417400  | -4.52514500 |
| H | -0.98318300 | 0.49438500  | -4.04230400 |
| H | 2.06312800  | 2.47397100  | -3.41692900 |
| H | 1.35381700  | 2.57886200  | -1.80647600 |
| H | 2.75753500  | 1.51039000  | -2.11405000 |
| C | 0.28783100  | 2.88745700  | 1.94922500  |
| C | 1.04815200  | 4.14728800  | 1.47309900  |
| C | -1.04576400 | 3.33475400  | 2.59285900  |
| C | 1.12725500  | 2.22010500  | 3.05643200  |
| H | 1.93904400  | 3.87251900  | 0.90572600  |
| H | 0.41947400  | 4.79528800  | 0.85942200  |
| H | 1.36496300  | 4.73373100  | 2.34290100  |
| H | -1.63234500 | 2.47896200  | 2.93784100  |
| H | -0.82705600 | 3.96856100  | 3.45832600  |
| H | -1.66539400 | 3.91261300  | 1.90469600  |
| H | 1.18867300  | 2.90164100  | 3.91084000  |
| H | 0.67957600  | 1.28827400  | 3.40402700  |
| H | 2.14187400  | 2.00909600  | 2.72481500  |
| N | 0.02845900  | 1.92303100  | 0.79181400  |
| N | 0.42921000  | 0.02471200  | -1.64365500 |
| N | 0.67476800  | -1.02659200 | 1.63281300  |
| C | -2.12237800 | 5.04385900  | -2.49699200 |
| H | -3.11585700 | 5.43022100  | -2.74172300 |
| H | -1.53815000 | 5.86194200  | -2.06334600 |
| H | -1.63578600 | 4.76580700  | -3.44017500 |
| C | -4.78578500 | 1.32016000  | -0.33731800 |
| H | -5.46053700 | 1.90219800  | 0.30286200  |
| H | -5.30980100 | 1.15506100  | -1.28503900 |
| H | -4.63261200 | 0.35023500  | 0.14416000  |
| C | -3.33412200 | -3.91642600 | 0.87898900  |
| H | -3.70930400 | -3.66111900 | -0.11793400 |
| H | -2.62555700 | -4.74067700 | 0.75115000  |
| H | -4.17844900 | -4.28362100 | 1.46982200  |
| C | -3.54272600 | -0.07751400 | 4.15877800  |

|    |             |             |             |
|----|-------------|-------------|-------------|
| H  | -4.48665300 | 0.30378700  | 3.75323000  |
| H  | -3.79451500 | -0.69826100 | 5.02678200  |
| H  | -2.96407900 | 0.77744200  | 4.51860500  |
| C  | 0.18368600  | -4.89756300 | -2.42747100 |
| H  | -0.07298800 | -5.54345700 | -1.57880800 |
| H  | -0.12992000 | -5.42230900 | -3.33619800 |
| H  | 1.27255800  | -4.80274900 | -2.45120500 |
| C  | -3.99773100 | -2.05255700 | -2.65647700 |
| H  | -4.20401400 | -1.38842300 | -3.50380900 |
| H  | -4.45209600 | -3.02266100 | -2.87677300 |
| H  | -4.51121000 | -1.62882900 | -1.78630400 |
| Nb | 1.21890200  | 0.29992100  | 0.18407600  |
| C  | 3.97641300  | 1.87738200  | 0.52089200  |
| N  | 2.84403200  | 1.46082500  | 0.58101000  |
| O  | 5.06539300  | 2.33778200  | 0.52071900  |
| C  | 3.90739900  | -1.06356000 | -0.99559200 |
| O  | 4.33859700  | -0.11265000 | -1.63995000 |
| C  | 4.70236500  | -2.35539800 | -0.86170100 |
| H  | 4.93506800  | -2.54412500 | 0.19126500  |
| H  | 4.11181200  | -3.20587100 | -1.21771200 |
| H  | 5.62812700  | -2.28392400 | -1.43332800 |
| O  | 2.74692200  | -1.08785000 | -0.37370400 |

TS\_NbN12

|   |             |             |             |
|---|-------------|-------------|-------------|
| C | -0.54935900 | 2.42716200  | -0.28828500 |
| C | -0.56749300 | 3.01825900  | -1.56888400 |
| C | -1.78861100 | 2.19931300  | 0.34037200  |
| C | -1.76215100 | 3.39742900  | -2.18949400 |
| H | 0.37530700  | 3.16091100  | -2.08799500 |
| C | -2.99861600 | 2.56018200  | -0.26203500 |
| H | -1.78559000 | 1.73295500  | 1.32074600  |
| C | -2.97319700 | 3.16331200  | -1.52617300 |
| H | -3.90967100 | 3.44934500  | -2.00317700 |
| C | -0.75481500 | -0.99069100 | 2.16095700  |
| C | -1.87693200 | -1.56175700 | 1.53157700  |
| C | -0.98446400 | -0.16632200 | 3.28240700  |
| C | -3.17583700 | -1.34737400 | 2.00718700  |
| H | -1.71234500 | -2.19542200 | 0.66531900  |
| C | -2.27151900 | 0.06617200  | 3.77644000  |
| H | -0.13113200 | 0.30724300  | 3.75869300  |
| C | -3.36114600 | -0.53486700 | 3.13295300  |

|   |             |             |             |
|---|-------------|-------------|-------------|
| H | -4.36755000 | -0.36785000 | 3.51457800  |
| C | -0.38693900 | -1.42370500 | -1.98699400 |
| C | -1.56946600 | -0.68682500 | -2.19095300 |
| C | -0.49839500 | -2.83050000 | -1.93258200 |
| C | -2.81170500 | -1.31281900 | -2.34852000 |
| H | -1.49732800 | 0.39522500  | -2.23475600 |
| C | -1.72340200 | -3.48045900 | -2.10425800 |
| H | 0.39482800  | -3.41555000 | -1.73770000 |
| C | -2.87605600 | -2.71099400 | -2.31415200 |
| H | -3.83520500 | -3.20875600 | -2.45223200 |
| C | 1.52551700  | 3.17759000  | 0.86226300  |
| C | 0.68722600  | 4.43228300  | 1.19416700  |
| C | 2.19720100  | 2.71130900  | 2.16880200  |
| C | 2.62616800  | 3.55355100  | -0.15334000 |
| H | 0.22601700  | 4.87125200  | 0.30518300  |
| H | -0.11136600 | 4.19505600  | 1.90508300  |
| H | 1.33315800  | 5.19227000  | 1.64825900  |
| H | 2.80582300  | 1.82422300  | 1.98595600  |
| H | 2.84260800  | 3.50185600  | 2.57213500  |
| H | 1.43789900  | 2.46727400  | 2.92002400  |
| H | 3.27475200  | 4.34343700  | 0.24813500  |
| H | 3.24544200  | 2.68133700  | -0.37356900 |
| H | 2.19120900  | 3.92608700  | -1.08670100 |
| C | 1.40974400  | -2.17267100 | 2.49769600  |
| C | 2.36375000  | -1.38454500 | 3.42148700  |
| C | 0.55148900  | -3.12867000 | 3.35548200  |
| C | 2.25045100  | -3.03791600 | 1.53834300  |
| H | 2.99090700  | -0.72074600 | 2.82197700  |
| H | 1.80543100  | -0.78262800 | 4.14656500  |
| H | 3.01576000  | -2.06547100 | 3.98397100  |
| H | -0.14911600 | -3.69491000 | 2.73292200  |
| H | 1.20653000  | -3.84297000 | 3.86691500  |
| H | -0.02809200 | -2.59951300 | 4.11713700  |
| H | 2.88498700  | -3.73100000 | 2.10521000  |
| H | 1.59403000  | -3.62493800 | 0.88666800  |
| H | 2.89720200  | -2.41307200 | 0.92057700  |
| C | 1.87082500  | -0.93657400 | -2.92769700 |
| C | 2.88011600  | -2.05723100 | -2.59310600 |
| C | 1.19678100  | -1.24577700 | -4.28277300 |
| C | 2.64068900  | 0.39000000  | -3.08971600 |
| H | 3.36129400  | -1.85242800 | -1.63418000 |
| H | 2.38626400  | -3.03268100 | -2.53375000 |
| H | 3.65745100  | -2.12762700 | -3.36545200 |
| H | 0.45910500  | -0.47731600 | -4.53675400 |

|          |             |             |             |
|----------|-------------|-------------|-------------|
| H        | 1.95652500  | -1.26386900 | -5.07247800 |
| H        | 0.68807600  | -2.21362100 | -4.28453200 |
| H        | 3.39696800  | 0.30136200  | -3.87990300 |
| H        | 1.95078600  | 1.19621100  | -3.36153500 |
| H        | 3.14274600  | 0.66170000  | -2.15944800 |
| N        | 0.85536100  | -0.75193600 | -1.83712300 |
| N        | 0.55593100  | -1.24845600 | 1.67394700  |
| N        | 0.66301600  | 2.05712000  | 0.35641300  |
| C        | -1.80157100 | -4.99164900 | -2.08738100 |
| H        | -2.74993500 | -5.34006700 | -1.66421600 |
| H        | -1.72683500 | -5.40894300 | -3.10064400 |
| H        | -0.98871100 | -5.42583400 | -1.49723700 |
| C        | -4.06743500 | -0.49316800 | -2.54821200 |
| H        | -4.70711700 | -0.92180400 | -3.32894300 |
| H        | -4.66431900 | -0.45108400 | -1.62794600 |
| H        | -3.82721700 | 0.53696700  | -2.82278000 |
| C        | -4.31063600 | 2.34219500  | 0.45875800  |
| H        | -4.23737700 | 1.51459500  | 1.16967100  |
| H        | -4.60767100 | 3.23585000  | 1.02457500  |
| H        | -5.12181000 | 2.12261100  | -0.24420400 |
| C        | -1.73979100 | 4.06067100  | -3.54943100 |
| H        | -2.71536500 | 3.99850900  | -4.04255200 |
| H        | -1.47961400 | 5.12473000  | -3.47207100 |
| H        | -0.99790300 | 3.59686500  | -4.20788100 |
| C        | -2.48405700 | 0.98511200  | 4.95976300  |
| H        | -2.46393600 | 2.03949800  | 4.65540200  |
| H        | -3.45085300 | 0.80278000  | 5.44069600  |
| H        | -1.70070400 | 0.85506800  | 5.71408300  |
| C        | -4.35429400 | -2.03001000 | 1.34834400  |
| H        | -4.58500900 | -2.98575400 | 1.83853000  |
| H        | -5.25921000 | -1.41472000 | 1.40365900  |
| H        | -4.14543500 | -2.24562900 | 0.29702300  |
| Nb       | 1.18814500  | 0.02235700  | 0.10836800  |
| C        | 5.02811400  | -0.05776400 | 0.21895700  |
| N        | 2.90925200  | 0.02392000  | 0.25865700  |
| O        | 5.24768400  | -1.19469400 | 0.49140600  |
| O        | 5.32673300  | 1.05648000  | -0.07081200 |
| TS_NbN03 |             |             |             |
| C        | -0.63827017 | -1.48534794 | 1.79873735  |
| C        | -1.33793283 | -0.92878082 | 2.88740029  |
| C        | -1.28978485 | -2.43721779 | 1.00564604  |

|   |             |             |             |
|---|-------------|-------------|-------------|
| C | -2.63954527 | -1.32119862 | 3.19711257  |
| H | -0.84114157 | -0.18771293 | 3.50277227  |
| C | -2.59530832 | -2.86339832 | 1.30392968  |
| H | -0.76495673 | -2.85912745 | 0.15566849  |
| C | -3.25440658 | -2.29727244 | 2.39657790  |
| H | -4.26320104 | -2.62605256 | 2.63885689  |
| C | -0.19233674 | -0.84599009 | -2.06981373 |
| C | -1.57464671 | -0.71167372 | -2.28053848 |
| C | 0.40407514  | -2.10303097 | -2.26621546 |
| C | -2.34588881 | -1.79215899 | -2.72018433 |
| H | -2.04090331 | 0.25143601  | -2.11087674 |
| C | -0.34976341 | -3.20236277 | -2.69517403 |
| H | 1.46796215  | -2.20759651 | -2.08520157 |
| C | -1.71852006 | -3.02802438 | -2.92924341 |
| H | -2.30859480 | -3.87121936 | -3.28459387 |
| C | -1.45035236 | 2.08903867  | 0.19555989  |
| C | -2.58477268 | 1.31781398  | 0.48094176  |
| C | -1.56291924 | 3.10300431  | -0.77337721 |
| C | -3.80828190 | 1.54862462  | -0.16319931 |
| H | -2.51043088 | 0.54024324  | 1.23067745  |
| C | -2.77062287 | 3.35460932  | -1.43187140 |
| H | -0.69183752 | 3.70162311  | -1.01527644 |
| C | -3.88715622 | 2.56768683  | -1.11691564 |
| H | -4.83360204 | 2.75999337  | -1.61860158 |
| C | 1.71603585  | -2.05167825 | 2.31330475  |
| C | 2.01715653  | -3.29870024 | 1.45539469  |
| C | 3.01940894  | -1.30327490 | 2.63517350  |
| C | 1.14106342  | -2.52597463 | 3.66769102  |
| H | 1.10551486  | -3.87790502 | 1.28203364  |
| H | 2.43806740  | -3.01301153 | 0.49030894  |
| H | 2.73193436  | -3.95108835 | 1.97097895  |
| H | 2.82185485  | -0.40746003 | 3.23027126  |
| H | 3.67856266  | -1.95698894 | 3.21533025  |
| H | 3.55907970  | -1.00846213 | 1.73926720  |
| H | 1.89546551  | -3.14499265 | 4.16371693  |
| H | 0.91232687  | -1.68517919 | 4.32825734  |
| H | 0.23853945  | -3.12923738 | 3.55316568  |
| C | 1.12781966  | 1.09222567  | -2.88146035 |
| C | 2.04664021  | 0.22741705  | -3.77066030 |
| C | -0.04042255 | 1.60982142  | -3.74852194 |
| C | 1.93134103  | 2.30139293  | -2.37759747 |
| H | 2.88727010  | -0.17014405 | -3.19815676 |
| H | 1.50504408  | -0.61293045 | -4.21153843 |
| H | 2.44529223  | 0.83720438  | -4.58853646 |

|   |             |             |             |
|---|-------------|-------------|-------------|
| H | -0.72998364 | 2.21370072  | -3.15571192 |
| H | 0.35877661  | 2.23023522  | -4.55820646 |
| H | -0.60131480 | 0.79032795  | -4.20323539 |
| H | 2.21729902  | 2.92632117  | -3.22945092 |
| H | 1.34664876  | 2.91705669  | -1.68972363 |
| H | 2.84482147  | 1.99651495  | -1.86527963 |
| C | 0.06257805  | 2.90920364  | 1.99674014  |
| C | 0.80688677  | 4.12594430  | 1.40941552  |
| C | -1.25558226 | 3.38007765  | 2.64907759  |
| C | 0.93172401  | 2.30037527  | 3.11527776  |
| H | 1.72084033  | 3.80375111  | 0.90474081  |
| H | 0.18125220  | 4.67870049  | 0.70366859  |
| H | 1.08763022  | 4.81869600  | 2.21096136  |
| H | -1.81069729 | 2.53826067  | 3.07433236  |
| H | -1.02089944 | 4.07691196  | 3.46007312  |
| H | -1.90868009 | 3.89638394  | 1.94259534  |
| H | 1.02107360  | 3.02376807  | 3.93248620  |
| H | 0.47891402  | 1.39138669  | 3.51900963  |
| H | 1.93677009  | 2.06640827  | 2.76632548  |
| N | -0.22191978 | 1.87549721  | 0.91136974  |
| N | 0.60824790  | 0.29373025  | -1.70594084 |
| N | 0.74321712  | -1.14710670 | 1.56722811  |
| C | -2.86229560 | 4.43457666  | -2.48626947 |
| H | -3.87258186 | 4.85096077  | -2.54414037 |
| H | -2.16851369 | 5.25536563  | -2.28063831 |
| H | -2.61506673 | 4.04267297  | -3.48126247 |
| C | -5.02845648 | 0.73525969  | 0.20655044  |
| H | -5.53225995 | 1.15849978  | 1.08514161  |
| H | -5.76053013 | 0.71574154  | -0.60673859 |
| H | -4.75864491 | -0.29555501 | 0.45380318  |
| C | -3.25073098 | -3.94737345 | 0.47954818  |
| H | -3.16381933 | -3.73802271 | -0.59043084 |
| H | -2.77188408 | -4.91870071 | 0.65514132  |
| H | -4.31056215 | -4.05389099 | 0.72825104  |
| C | -3.38310533 | -0.70176783 | 4.35825202  |
| H | -4.11473496 | 0.03908199  | 4.01221616  |
| H | -3.93532217 | -1.45654141 | 4.92801681  |
| H | -2.70087339 | -0.19226741 | 5.04451263  |
| C | 0.29937093  | -4.55473738 | -2.88698786 |
| H | 0.16783812  | -5.18889140 | -2.00131311 |
| H | -0.13708770 | -5.09121718 | -3.73553641 |
| H | 1.37494717  | -4.46092561 | -3.06220585 |
| C | -3.82446959 | -1.62627062 | -2.99040637 |
| H | -4.05421858 | -1.79241159 | -4.04972623 |

|    |             |             |             |
|----|-------------|-------------|-------------|
| H  | -4.42187317 | -2.34447231 | -2.41734956 |
| H  | -4.16467803 | -0.62142569 | -2.72796599 |
| Nb | 1.10213679  | 0.43020060  | 0.28141936  |
| C  | 4.01568261  | 1.39096789  | 0.67750527  |
| N  | 2.70030197  | 1.31002304  | 0.62425371  |
| O  | 4.77025248  | 2.09469597  | 1.29864031  |
| C  | 4.19400919  | -0.65154634 | -0.76985511 |
| O  | 4.73574686  | 0.43890569  | -0.23456397 |
| C  | 5.21404266  | -1.44392134 | -1.55126450 |
| H  | 5.95856874  | -1.85061321 | -0.85942820 |
| H  | 4.72543735  | -2.25884988 | -2.08480794 |
| H  | 5.74352545  | -0.79063411 | -2.24968443 |
| O  | 3.02744046  | -1.02347396 | -0.64597780 |

TaNl

|   |             |             |             |
|---|-------------|-------------|-------------|
| C | -2.23550569 | 0.45118532  | 0.94411872  |
| C | -2.81998737 | -0.38407588 | 1.92526355  |
| C | -1.66171073 | 1.65650552  | 1.37963037  |
| C | -2.85319652 | -0.02728620 | 3.27308359  |
| H | -3.23666560 | -1.33630093 | 1.61184512  |
| C | -1.67414350 | 2.03551701  | 2.73012833  |
| H | -1.20715815 | 2.30542096  | 0.63696569  |
| C | -2.27576758 | 1.19114045  | 3.66633275  |
| H | -2.29536933 | 1.48082803  | 4.71621287  |
| C | 1.13841591  | 1.81299003  | -1.18491902 |
| C | 2.02121529  | 1.87924127  | -0.09365362 |
| C | 0.43821323  | 2.99122777  | -1.52889592 |
| C | 2.22309789  | 3.06768280  | 0.62199675  |
| H | 2.56417500  | 0.97991727  | 0.18089917  |
| C | 0.62161485  | 4.18850146  | -0.83444773 |
| H | -0.27225238 | 2.94974195  | -2.34889625 |
| C | 1.52237567  | 4.21638218  | 0.24074891  |
| H | 1.67822912  | 5.14612412  | 0.78678544  |
| C | 1.40097523  | -1.67327552 | 1.10704193  |
| C | 1.00249059  | -0.95657352 | 2.25355916  |
| C | 2.78682884  | -1.85227952 | 0.90497389  |
| C | 1.93244984  | -0.45076009 | 3.16827960  |
| H | -0.05982452 | -0.81616096 | 2.42817459  |
| C | 3.73529983  | -1.37361255 | 1.81348729  |
| H | 3.11831787  | -2.37238071 | 0.01144726  |



|   |             |             |             |
|---|-------------|-------------|-------------|
| C | 3.29745325  | -0.67587741 | 2.94589112  |
| H | 4.02789743  | -0.30607922 | 3.66408038  |
| C | -3.53211103 | 0.09216533  | -1.15157877 |
| C | -3.29607648 | 0.63082709  | -2.57718159 |
| C | -4.12483465 | -1.32932677 | -1.25595083 |
| C | -4.55582921 | 1.02502357  | -0.46858950 |
| H | -2.90261921 | 1.65263712  | -2.53419156 |
| H | -2.57547900 | -0.00329164 | -3.09751216 |
| H | -4.23593283 | 0.64478450  | -3.14478597 |
| H | -4.36461135 | -1.73396080 | -0.26638063 |
| H | -5.05076304 | -1.32590958 | -1.84685422 |
| H | -3.39737024 | -1.98529347 | -1.74067328 |
| H | -5.46264800 | 1.07929148  | -1.08184059 |
| H | -4.84447792 | 0.67429016  | 0.52605032  |
| H | -4.15462280 | 2.03872954  | -0.36391310 |
| C | 1.58060068  | 0.55506710  | -3.28342073 |
| C | 0.53461451  | 0.86375381  | -4.37614473 |
| C | 2.76172390  | 1.54156731  | -3.41589874 |
| C | 2.13415154  | -0.86413871 | -3.51920583 |
| H | -0.29753670 | 0.16153794  | -4.28329600 |
| H | 0.15099674  | 1.88548762  | -4.28069284 |
| H | 0.97242460  | 0.76510002  | -5.37871509 |
| H | 3.51801448  | 1.35657842  | -2.64570793 |
| H | 3.23540693  | 1.41068164  | -4.39565670 |
| H | 2.44693974  | 2.58560768  | -3.33285517 |
| H | 2.59414143  | -0.93675228 | -4.51370088 |
| H | 2.89477148  | -1.10190705 | -2.76702061 |
| H | 1.32562924  | -1.59432670 | -3.44589135 |
| C | 0.34022650  | -3.67784006 | 0.07057630  |
| C | 1.10631233  | -4.19444720 | -1.16663566 |
| C | 0.85799301  | -4.39810860 | 1.33500940  |
| C | -1.14817870 | -4.04922949 | -0.08996073 |
| H | 0.73275430  | -3.68280003 | -2.05721233 |
| H | 2.18239433  | -4.01069784 | -1.07628078 |
| H | 0.96362651  | -5.27634573 | -1.29159153 |
| H | 0.34637046  | -4.03163884 | 2.23154665  |
| H | 0.66151294  | -5.47278080 | 1.24601613  |
| H | 1.93268739  | -4.26628504 | 1.48567439  |
| H | -1.26402469 | -5.13606168 | -0.19525879 |
| H | -1.71574059 | -3.72486032 | 0.78947359  |
| H | -1.55772569 | -3.56196556 | -0.97704638 |
| N | 0.43017885  | -2.18020003 | 0.20186904  |
| N | 0.96697459  | 0.59830599  | -1.90848173 |
| N | -2.20968158 | 0.09132514  | -0.43181697 |

|    |             |             |             |
|----|-------------|-------------|-------------|
| C  | 5.21034884  | -1.61366660 | 1.57351643  |
| H  | 5.82719535  | -1.06906038 | 2.29556700  |
| H  | 5.46382722  | -2.67823948 | 1.65739146  |
| H  | 5.50953200  | -1.29357423 | 0.56887190  |
| C  | 1.47417373  | 0.33345111  | 4.37752462  |
| H  | 2.14863535  | 0.18814239  | 5.22922344  |
| H  | 1.44484251  | 1.40925740  | 4.16324354  |
| H  | 0.46433915  | 0.04424585  | 4.68099408  |
| C  | -1.07800457 | 3.36063724  | 3.15046171  |
| H  | -0.11272986 | 3.53141032  | 2.66363899  |
| H  | -1.72915822 | 4.19786740  | 2.86577311  |
| H  | -0.93508800 | 3.41017674  | 4.23495095  |
| C  | -3.48169494 | -0.94094898 | 4.30283094  |
| H  | -2.74867596 | -1.27080437 | 5.04944914  |
| H  | -4.28884489 | -0.43674714 | 4.84926765  |
| H  | -3.90319236 | -1.83560936 | 3.83546086  |
| C  | -0.15665265 | 5.43038650  | -1.21114634 |
| H  | -0.91748794 | 5.67125534  | -0.45770254 |
| H  | 0.49822481  | 6.30610092  | -1.29554464 |
| H  | -0.67151121 | 5.30224094  | -2.16783023 |
| C  | 3.22962576  | 3.11800472  | 1.75081953  |
| H  | 4.23180501  | 3.37059449  | 1.37826166  |
| H  | 2.96244621  | 3.87715092  | 2.49423435  |
| H  | 3.30596278  | 2.15058640  | 2.25484028  |
| N  | -0.89528966 | -1.69235761 | -2.45563586 |
| Ta | -0.40802618 | -0.75225110 | -1.09118768 |

TaN2

|   |             |             |             |
|---|-------------|-------------|-------------|
| C | -0.50750616 | 2.39370170  | 0.23523722  |
| C | -0.45279696 | 3.23996059  | -0.89428393 |
| C | -1.76765846 | 2.11497857  | 0.78483805  |
| C | -1.60439820 | 3.80239685  | -1.44498977 |
| H | 0.51265399  | 3.43788483  | -1.34742851 |
| C | -2.94238353 | 2.66244060  | 0.24651931  |
| H | -1.81909312 | 1.46477113  | 1.65253303  |
| C | -2.84785014 | 3.50455984  | -0.86340451 |
| H | -3.75374051 | 3.93715357  | -1.28614700 |
| C | -0.84416786 | -1.36545429 | 1.88266276  |
| C | -2.00782705 | -1.75329235 | 1.19945709  |
| C | -0.99114393 | -0.76798495 | 3.15135127  |
| C | -3.28081271 | -1.57530419 | 1.75858089  |

|   |             |             |             |
|---|-------------|-------------|-------------|
| H | -1.90205695 | -2.21505265 | 0.22270398  |
| C | -2.24776029 | -0.57586123 | 3.73033890  |
| H | -0.09980242 | -0.43961151 | 3.67622986  |
| C | -3.38713332 | -0.98775415 | 3.02331099  |
| H | -4.37163531 | -0.84829515 | 3.46792223  |
| C | -0.55278185 | -0.93035110 | -2.19051226 |
| C | -1.71850182 | -0.14744091 | -2.28102869 |
| C | -0.67317926 | -2.31909160 | -2.38571821 |
| C | -2.96350067 | -0.71709905 | -2.56826824 |
| H | -1.63213766 | 0.92450986  | -2.13306219 |
| C | -1.90401277 | -2.91252968 | -2.68764289 |
| H | 0.21387512  | -2.93712791 | -2.28804742 |
| C | -3.04118599 | -2.10052985 | -2.77803547 |
| H | -4.00262333 | -2.55338715 | -3.01620728 |
| C | 1.55714218  | 2.75983047  | 1.59524678  |
| C | 0.71314598  | 3.86841180  | 2.25935267  |
| C | 2.24147971  | 1.95522428  | 2.71654861  |
| C | 2.65293141  | 3.39275021  | 0.71213679  |
| H | 0.24080497  | 4.52718259  | 1.52510505  |
| H | -0.07654520 | 3.44262941  | 2.88795190  |
| H | 1.36028384  | 4.48370528  | 2.89377051  |
| H | 2.90614162  | 1.19908213  | 2.29705897  |
| H | 2.84188908  | 2.62513925  | 3.34359771  |
| H | 1.49419196  | 1.46701338  | 3.35171993  |
| H | 3.25969365  | 4.08770428  | 1.30800240  |
| H | 3.32023594  | 2.62071584  | 0.31400701  |
| H | 2.21652763  | 3.96851360  | -0.11113490 |
| C | 1.23547467  | -2.75035087 | 1.83866189  |
| C | 2.16826585  | -2.30472796 | 2.98329433  |
| C | 0.29020236  | -3.85808683 | 2.35069017  |
| C | 2.09171462  | -3.35005495 | 0.70578887  |
| H | 2.85169939  | -1.53193936 | 2.62475207  |
| H | 1.59946976  | -1.91555896 | 3.83486650  |
| H | 2.76835754  | -3.15017321 | 3.34190653  |
| H | -0.38138104 | -4.20057734 | 1.55639087  |
| H | 0.88775464  | -4.71377964 | 2.68263324  |
| H | -0.32392188 | -3.53062784 | 3.19454964  |
| H | 2.57964635  | -4.26570167 | 1.06350876  |
| H | 1.45433198  | -3.61962617 | -0.14381138 |
| H | 2.88000875  | -2.66783381 | 0.37164828  |
| C | 1.67611034  | -0.18211591 | -3.05503313 |
| C | 2.64881392  | -1.37910542 | -3.10426860 |
| C | 0.92220829  | -0.07929186 | -4.39762188 |
| C | 2.48067531  | 1.12074595  | -2.87460598 |

|    |             |             |             |
|----|-------------|-------------|-------------|
| H  | 3.20600490  | -1.47192334 | -2.16842179 |
| H  | 2.11001651  | -2.31511128 | -3.28760786 |
| H  | 3.37094589  | -1.25075798 | -3.92074201 |
| H  | 0.20868623  | 0.75137111  | -4.38886539 |
| H  | 1.64305040  | 0.09937792  | -5.20273315 |
| H  | 0.37243421  | -0.99390953 | -4.63702350 |
| H  | 3.16900504  | 1.25215059  | -3.71824702 |
| H  | 1.80414026  | 1.98208244  | -2.85039331 |
| H  | 3.07579459  | 1.11438492  | -1.95934334 |
| N  | 0.70563270  | -0.31590913 | -1.90262750 |
| N  | 0.44470976  | -1.57764118 | 1.29946070  |
| N  | 0.67508219  | 1.82259397  | 0.80227775  |
| C  | -1.99463869 | -4.40525626 | -2.91749229 |
| H  | -3.03523259 | -4.73769581 | -2.98532622 |
| H  | -1.49153323 | -4.69818969 | -3.84749782 |
| H  | -1.51488929 | -4.96388623 | -2.10623836 |
| C  | -4.20701662 | 0.14096678  | -2.64045928 |
| H  | -4.85347776 | -0.15770232 | -3.47378313 |
| H  | -4.80236369 | 0.05637298  | -1.72241696 |
| H  | -3.95288017 | 1.19714896  | -2.76169571 |
| C  | -4.27992884 | 2.36836788  | 0.88785301  |
| H  | -4.35426816 | 1.31627612  | 1.17941592  |
| H  | -4.42273575 | 2.96375384  | 1.79925606  |
| H  | -5.10913219 | 2.60088913  | 0.21187729  |
| C  | -1.52459385 | 4.70613877  | -2.65566691 |
| H  | -2.10638935 | 4.30604424  | -3.49497160 |
| H  | -1.92312890 | 5.70488953  | -2.43775777 |
| H  | -0.49182284 | 4.82597105  | -2.99443405 |
| C  | -2.38268681 | 0.09803594  | 5.07810312  |
| H  | -2.64601182 | 1.15812034  | 4.97039697  |
| H  | -3.16718102 | -0.36890221 | 5.68416340  |
| H  | -1.44651450 | 0.05171063  | 5.64218906  |
| C  | -4.51149227 | -2.06145301 | 1.02525425  |
| H  | -4.73462226 | -3.10719234 | 1.27601972  |
| H  | -5.39635596 | -1.47140612 | 1.28725650  |
| H  | -4.37009865 | -2.01245434 | -0.05813264 |
| C  | 4.33490218  | -0.22767863 | 0.06789930  |
| N  | 2.86215628  | -0.15979061 | 0.19056748  |
| O  | 4.77912839  | -1.38877798 | -0.03831074 |
| O  | 4.89412647  | 0.88729733  | 0.06516525  |
| Ta | 1.11460511  | -0.05571538 | 0.09277927  |

TaNO

|   |             |             |             |
|---|-------------|-------------|-------------|
| C | 1.03080200  | 1.17588200  | 1.96583300  |
| C | 1.38587400  | 0.49272700  | 3.14194500  |
| C | 2.01149000  | 1.91675100  | 1.29383000  |
| C | 2.68574100  | 0.55286500  | 3.65207000  |
| H | 0.63008600  | -0.08724000 | 3.66037300  |
| C | 3.32357500  | 1.99117700  | 1.78157600  |
| H | 1.73698900  | 2.45094600  | 0.39059800  |
| C | 3.64353700  | 1.30770400  | 2.95947200  |
| H | 4.65709300  | 1.36813300  | 3.35198400  |
| C | 0.38514700  | 1.32277700  | -1.97002400 |
| C | 1.72908200  | 1.00150600  | -2.21708700 |
| C | 0.00084800  | 2.67219700  | -1.97762000 |
| C | 2.67330600  | 1.99849800  | -2.48709800 |
| H | 2.03005700  | -0.04031700 | -2.20778700 |
| C | 0.92850500  | 3.69009500  | -2.22880000 |
| H | -1.03673500 | 2.92106100  | -1.78222300 |
| C | 2.25898100  | 3.33637100  | -2.48563300 |
| H | 2.98592100  | 4.11923300  | -2.69366400 |
| C | 1.41649600  | -2.15907700 | -0.19451800 |
| C | 2.62912700  | -1.65155100 | 0.29674300  |
| C | 1.42303100  | -2.86419600 | -1.40893500 |
| C | 3.83058100  | -1.84851700 | -0.39485300 |
| H | 2.62593500  | -1.11327800 | 1.23817400  |
| C | 2.60888800  | -3.06783000 | -2.12436100 |
| H | 0.48891600  | -3.25342000 | -1.79968600 |
| C | 3.80325300  | -2.55411400 | -1.60415600 |
| H | 4.73154300  | -2.71469400 | -2.14903500 |
| C | -1.27450800 | 2.12775900  | 2.17807200  |
| C | -0.51323500 | 3.34152900  | 2.74676900  |
| C | -2.29392500 | 2.65770600  | 1.15421900  |
| C | -2.01476100 | 1.41287400  | 3.32506900  |
| H | 0.19655700  | 3.06039600  | 3.52803000  |
| H | 0.03439700  | 3.87426600  | 1.96418900  |
| H | -1.23773400 | 4.03460000  | 3.18612800  |
| H | -2.87878400 | 1.84605500  | 0.71919100  |
| H | -2.98873500 | 3.34807200  | 1.64494200  |
| H | -1.78326500 | 3.20003900  | 0.35399900  |
| H | -2.71246200 | 2.10088000  | 3.81576600  |
| H | -2.58542400 | 0.56353400  | 2.94296700  |
| H | -1.31418600 | 1.05346500  | 4.08446500  |
| C | -1.30874200 | -0.21417500 | -2.97205500 |
| C | -2.24260200 | 0.88077000  | -3.52268400 |
| C | -0.28946700 | -0.61304800 | -4.05867200 |

|   |             |             |             |
|---|-------------|-------------|-------------|
| C | -2.15851400 | -1.44792600 | -2.62420700 |
| H | -2.99124000 | 1.16168000  | -2.77728300 |
| H | -1.68623800 | 1.76964700  | -3.83173300 |
| H | -2.77500100 | 0.50098000  | -4.40150000 |
| H | 0.38540600  | -1.39344100 | -3.69592800 |
| H | -0.82637600 | -1.00147700 | -4.93019400 |
| H | 0.31388300  | 0.23529900  | -4.39015300 |
| H | -2.53354600 | -1.89565900 | -3.54992000 |
| H | -1.57056900 | -2.21206200 | -2.10552500 |
| H | -3.02410900 | -1.18716400 | -2.01618600 |
| C | -0.21917200 | -3.17236600 | 1.41293800  |
| C | -1.13942600 | -4.10601400 | 0.60354700  |
| C | 1.01465800  | -3.95656100 | 1.90129200  |
| C | -0.97442500 | -2.66816000 | 2.65465700  |
| H | -2.05120600 | -3.58540700 | 0.30089100  |
| H | -0.62975800 | -4.49085400 | -0.28459700 |
| H | -1.43197100 | -4.96792400 | 1.21422000  |
| H | 1.70364000  | -3.31322700 | 2.45679300  |
| H | 0.68217400  | -4.75601600 | 2.57081400  |
| H | 1.56653700  | -4.41773000 | 1.07883200  |
| H | -1.27720700 | -3.51972000 | 3.27244200  |
| H | -0.33438600 | -2.02003000 | 3.25952700  |
| H | -1.87751200 | -2.12127400 | 2.38218400  |
| N | 0.20138200  | -1.98122600 | 0.56377100  |
| N | -0.57961600 | 0.27619100  | -1.73262500 |
| N | -0.32603500 | 1.16215300  | 1.47886300  |
| C | 2.59147600  | -3.80816200 | -3.44256900 |
| H | 3.59010000  | -4.16133500 | -3.71528000 |
| H | 1.92383500  | -4.67482800 | -3.40536300 |
| H | 2.23758600  | -3.16349300 | -4.25677200 |
| C | 5.13826400  | -1.34956700 | 0.17692200  |
| H | 5.66197800  | -2.14981700 | 0.71519100  |
| H | 5.81375200  | -0.99760500 | -0.60970100 |
| H | 4.97544500  | -0.53193400 | 0.88387400  |
| C | 4.37602800  | 2.78735500  | 1.04401600  |
| H | 4.97710600  | 2.14133000  | 0.39229600  |
| H | 3.92277300  | 3.55501600  | 0.41139000  |
| H | 5.06548800  | 3.27740500  | 1.73903600  |
| C | 3.04867500  | -0.15552500 | 4.93757100  |
| H | 4.00670000  | -0.67863200 | 4.85026500  |
| H | 3.14482300  | 0.55523200  | 5.76762400  |
| H | 2.28793400  | -0.88869000 | 5.21958600  |
| C | 0.50322400  | 5.14083000  | -2.20020100 |
| H | 0.49133800  | 5.53238500  | -1.17524400 |

|    |             |             |             |
|----|-------------|-------------|-------------|
| H  | 1.18536300  | 5.76855200  | -2.78103000 |
| H  | -0.50482500 | 5.27033200  | -2.60634700 |
| C  | 4.10420700  | 1.63273800  | -2.80983100 |
| H  | 4.26855500  | 1.60399800  | -3.89448500 |
| H  | 4.80897200  | 2.36174800  | -2.39719400 |
| H  | 4.35802200  | 0.64553900  | -2.41453200 |
| C  | -3.84297900 | -1.12293100 | 0.60937300  |
| N  | -2.58915800 | -0.66886800 | 0.49732400  |
| O  | -4.25097000 | -2.26101600 | 0.61036800  |
| C  | -5.41733400 | 0.45476700  | -0.23893200 |
| O  | -4.79511700 | -0.06323000 | 0.85038400  |
| C  | -6.47702500 | 1.44859800  | 0.17130700  |
| H  | -6.03367500 | 2.24221700  | 0.77974000  |
| H  | -6.94035100 | 1.87302200  | -0.71890000 |
| H  | -7.23323500 | 0.95027600  | 0.78499000  |
| O  | -5.14213200 | 0.15228900  | -1.37907900 |
| Ta | -0.83483200 | -0.29716000 | 0.17883800  |

TaN3

|   |             |             |             |
|---|-------------|-------------|-------------|
| C | -0.88404800 | -1.23489400 | 1.84943400  |
| C | -1.57337200 | -0.44318000 | 2.78060200  |
| C | -1.57223400 | -2.29238300 | 1.23623900  |
| C | -2.91132600 | -0.68702400 | 3.10380600  |
| H | -1.05163600 | 0.36976700  | 3.26692900  |
| C | -2.90511200 | -2.57928500 | 1.56329300  |
| H | -1.05642200 | -2.90270800 | 0.50445600  |
| C | -3.56284900 | -1.76347600 | 2.48957200  |
| H | -4.59826400 | -1.97757100 | 2.74737300  |
| C | -0.50454100 | -1.19149700 | -1.85678800 |
| C | -1.88372000 | -1.04432900 | -2.04463400 |
| C | 0.07009900  | -2.46912500 | -1.96575000 |
| C | -2.68444400 | -2.14599700 | -2.37331600 |
| H | -2.32633200 | -0.06089200 | -1.94128600 |
| C | -0.70889900 | -3.58369800 | -2.28863800 |
| H | 1.13626500  | -2.57394400 | -1.80510100 |
| C | -2.08245200 | -3.40209500 | -2.50265000 |
| H | -2.69518300 | -4.25831100 | -2.77839000 |
| C | -1.08406200 | 2.34051400  | -0.05613500 |
| C | -2.33343100 | 1.71471800  | 0.08854000  |

|   |             |             |             |
|---|-------------|-------------|-------------|
| C | -0.99707400 | 3.44695000  | -0.91410300 |
| C | -3.46810000 | 2.17754900  | -0.58454900 |
| H | -2.41652400 | 0.86950100  | 0.76081000  |
| C | -2.11904500 | 3.93311200  | -1.60120700 |
| H | -0.04261900 | 3.93868500  | -1.06027800 |
| C | -3.34789000 | 3.29189400  | -1.42586500 |
| H | -4.22551900 | 3.66672200  | -1.94891000 |
| C | 1.41319300  | -1.93959800 | 2.48940400  |
| C | 1.59117300  | -3.31680100 | 1.82165300  |
| C | 2.78802300  | -1.28772200 | 2.72929000  |
| C | 0.77772500  | -2.14396900 | 3.88157400  |
| H | 0.63523900  | -3.84213700 | 1.74620000  |
| H | 2.01484000  | -3.20444300 | 0.82366100  |
| H | 2.26349900  | -3.93989900 | 2.42277300  |
| H | 2.68276500  | -0.32020800 | 3.22656900  |
| H | 3.37840900  | -1.93637600 | 3.38433900  |
| H | 3.34624300  | -1.14962200 | 1.80611700  |
| H | 1.46146800  | -2.75057600 | 4.48383300  |
| H | 0.62755900  | -1.19400500 | 4.40254400  |
| H | -0.17957900 | -2.66624900 | 3.83672300  |
| C | 0.80050100  | 0.64684800  | -2.91775700 |
| C | 1.52479600  | -0.34886300 | -3.84650100 |
| C | -0.40862100 | 1.23589100  | -3.66927500 |
| C | 1.79106000  | 1.76691200  | -2.56097600 |
| H | 2.41786700  | -0.75630100 | -3.36990000 |
| H | 0.87318600  | -1.16711300 | -4.16123100 |
| H | 1.84415000  | 0.18657000  | -4.74698800 |
| H | -0.97257600 | 1.92743800  | -3.04212100 |
| H | -0.04568500 | 1.78133700  | -4.54708500 |
| H | -1.08318500 | 0.45337100  | -4.02436300 |
| H | 2.03374400  | 2.33012500  | -3.46741500 |
| H | 1.36694100  | 2.47209300  | -1.84322300 |
| H | 2.72513800  | 1.35280700  | -2.17397300 |
| C | 0.33503300  | 2.84976500  | 1.88738600  |
| C | 1.14189700  | 4.07802100  | 1.40701100  |
| C | -0.98000700 | 3.35443900  | 2.52647500  |
| C | 1.14514900  | 2.16239100  | 3.00558500  |
| H | 2.02237300  | 3.77015700  | 0.84035000  |
| H | 0.53776100  | 4.74590200  | 0.79017000  |
| H | 1.47962000  | 4.65684700  | 2.27411200  |
| H | -1.60094000 | 2.52748200  | 2.88059500  |
| H | -0.73601600 | 3.98779400  | 3.38549800  |
| H | -1.57610200 | 3.95051500  | 1.83328900  |
| H | 1.21594100  | 2.84538300  | 3.85810100  |



|    |             |             |             |
|----|-------------|-------------|-------------|
| H  | 0.66900900  | 1.24467800  | 3.35198300  |
| H  | 2.15843400  | 1.92270700  | 2.68978100  |
| N  | 0.04077300  | 1.88641200  | 0.72969500  |
| N  | 0.34138200  | -0.04093000 | -1.63376600 |
| N  | 0.53171200  | -1.04174400 | 1.60903400  |
| C  | -1.98349400 | 5.11126800  | -2.53903900 |
| H  | -2.95666200 | 5.55720800  | -2.76336200 |
| H  | -1.34325300 | 5.89109900  | -2.11399300 |
| H  | -1.53255700 | 4.80903800  | -3.49251400 |
| C  | -4.80854800 | 1.50521600  | -0.38628100 |
| H  | -5.52791700 | 2.18508900  | 0.08590500  |
| H  | -5.24668200 | 1.19291900  | -1.34133400 |
| H  | -4.71836900 | 0.61993800  | 0.24910200  |
| C  | -3.60448700 | -3.78066200 | 0.96908800  |
| H  | -3.19538400 | -4.03447200 | -0.01150000 |
| H  | -3.48681900 | -4.66037600 | 1.61474900  |
| H  | -4.67929200 | -3.60497900 | 0.85885600  |
| C  | -3.64036800 | 0.20345200  | 4.08411500  |
| H  | -4.07554800 | 1.07519300  | 3.57946200  |
| H  | -4.45872300 | -0.32986500 | 4.57698500  |
| H  | -2.96754000 | 0.58191800  | 4.85974000  |
| C  | -0.08646500 | -4.95745100 | -2.39413100 |
| H  | -0.19837800 | -5.51796200 | -1.45749800 |
| H  | -0.55852300 | -5.55060600 | -3.18367500 |
| H  | 0.98378600  | -4.89581800 | -2.61076900 |
| C  | -4.17267600 | -1.97355000 | -2.57312600 |
| H  | -4.39416100 | -1.10043500 | -3.19572500 |
| H  | -4.61633400 | -2.85114500 | -3.05189900 |
| H  | -4.68385600 | -1.82443700 | -1.61447800 |
| C  | 3.93403200  | 1.71340700  | 0.47633300  |
| N  | 2.79754400  | 1.30779200  | 0.53248800  |
| O  | 5.02679300  | 2.16161400  | 0.47347600  |
| C  | 3.74675000  | -1.25594000 | -0.98302200 |
| O  | 4.22426900  | -0.33733100 | -1.63820500 |
| C  | 4.45979400  | -2.59124500 | -0.83885700 |
| H  | 4.65426600  | -2.80273400 | 0.21733500  |
| H  | 3.82632200  | -3.40060000 | -1.21675700 |
| H  | 5.40046300  | -2.57352800 | -1.38961900 |
| O  | 2.58585200  | -1.20356400 | -0.35508200 |
| Ta | 1.14444300  | 0.22727700  | 0.16562400  |

TS\_TaN12

|   |             |             |             |
|---|-------------|-------------|-------------|
| C | -0.71346981 | 2.29973999  | -0.66486175 |
| C | -0.79974620 | 2.66583746  | -2.02448223 |
| C | -1.91393885 | 2.19159304  | 0.05863744  |
| C | -2.02510907 | 2.94180540  | -2.63682806 |
| H | 0.11643327  | 2.72022463  | -2.60438623 |
| C | -3.15685844 | 2.45648337  | -0.53223317 |
| H | -1.85686103 | 1.90518872  | 1.10457610  |
| C | -3.19933972 | 2.83540271  | -1.87840248 |
| H | -4.16007010 | 3.04734845  | -2.34575577 |
| C | -0.75848522 | -0.60677237 | 2.30005862  |
| C | -1.90387531 | -1.24771236 | 1.79632771  |
| C | -0.94366770 | 0.35802696  | 3.31505946  |
| C | -3.18464571 | -0.96449821 | 2.29092116  |
| H | -1.77725331 | -1.99224129 | 1.01659517  |
| C | -2.20754855 | 0.65655915  | 3.82719630  |
| H | -0.07339719 | 0.88532998  | 3.69368217  |
| C | -3.32434841 | -0.01576269 | 3.30913301  |
| H | -4.31499196 | 0.20578416  | 3.70459270  |
| C | -0.54128845 | -1.73698898 | -1.70918333 |
| C | -1.72749554 | -1.07256832 | -2.06007654 |
| C | -0.63313324 | -3.10573170 | -1.36794512 |
| C | -2.96287415 | -1.73726266 | -2.09103013 |
| H | -1.67094150 | -0.02091900 | -2.32543855 |
| C | -1.84686584 | -3.79161391 | -1.39689940 |
| H | 0.27032245  | -3.62318679 | -1.06165836 |
| C | -3.01001412 | -3.09470239 | -1.76420856 |
| H | -3.96313264 | -3.62126818 | -1.79440887 |
| C | 1.39990875  | 3.25450452  | 0.24113083  |
| C | 0.54836663  | 4.53481448  | 0.38476383  |
| C | 2.12821327  | 3.03406367  | 1.58075905  |
| C | 2.45609468  | 3.46346440  | -0.86442183 |
| H | 0.04956075  | 4.81248891  | -0.54774817 |
| H | -0.22061382 | 4.41324501  | 1.15507572  |
| H | 1.19579994  | 5.36837137  | 0.67978479  |
| H | 2.75734629  | 2.14508007  | 1.52146821  |
| H | 2.76198801  | 3.89854292  | 1.81682700  |
| H | 1.40340736  | 2.90645632  | 2.39250467  |
| H | 3.10652321  | 4.31610032  | -0.62786748 |
| H | 3.07859114  | 2.57091085  | -0.95226422 |
| H | 1.98220197  | 3.66731946  | -1.83079122 |

|   |             |             |             |
|---|-------------|-------------|-------------|
| C | 1.43736593  | -1.69690497 | 2.74576382  |
| C | 2.43105447  | -0.76409960 | 3.46897820  |
| C | 0.62289316  | -2.48400625 | 3.79522422  |
| C | 2.23790016  | -2.72541961 | 1.92307201  |
| H | 3.01333415  | -0.21239225 | 2.72807108  |
| H | 1.91075761  | -0.05084202 | 4.11763436  |
| H | 3.12180736  | -1.34322052 | 4.09556882  |
| H | -0.10391806 | -3.14710883 | 3.31409578  |
| H | 1.30439105  | -3.10111766 | 4.39150624  |
| H | 0.07772053  | -1.82943636 | 4.48042373  |
| H | 2.89093638  | -3.31380379 | 2.58061287  |
| H | 1.55307818  | -3.41116682 | 1.41215470  |
| H | 2.86005185  | -2.22386427 | 1.18083558  |
| C | 1.67985119  | -1.40886328 | -2.78731946 |
| C | 2.71044663  | -2.45047735 | -2.30288528 |
| C | 0.95424595  | -1.95065584 | -4.03836212 |
| C | 2.42815143  | -0.12906854 | -3.21112495 |
| H | 3.22848056  | -2.06934089 | -1.42012597 |
| H | 2.22656303  | -3.39887293 | -2.04583251 |
| H | 3.45308810  | -2.65895680 | -3.08446163 |
| H | 0.19761548  | -1.24207158 | -4.39149849 |
| H | 1.68243650  | -2.09988963 | -4.84364843 |
| H | 0.45815404  | -2.90753274 | -3.85408326 |
| H | 3.15082672  | -0.35385180 | -4.00599315 |
| H | 1.71928646  | 0.61479872  | -3.59128236 |
| H | 2.96393195  | 0.29940610  | -2.36309617 |
| N | 0.70562402  | -1.04686056 | -1.69566686 |
| N | 0.53781144  | -0.93211616 | 1.80346231  |
| N | 0.54086482  | 2.04549327  | -0.03627392 |
| C | -1.91940196 | -5.25874375 | -1.03322875 |
| H | -2.60138460 | -5.43203129 | -0.19167462 |
| H | -2.28743116 | -5.86316078 | -1.87204027 |
| H | -0.93661953 | -5.64604560 | -0.74981658 |
| C | -4.21020013 | -0.99976287 | -2.52489779 |
| H | -5.11796559 | -1.52582880 | -2.21137838 |
| H | -4.23289697 | 0.01182642  | -2.10953728 |
| H | -4.25096832 | -0.89918601 | -3.61774568 |
| C | -4.42590438 | 2.38697667  | 0.28876282  |
| H | -4.61938412 | 3.33921096  | 0.80123297  |
| H | -5.29822956 | 2.17548583  | -0.33926555 |
| H | -4.35710134 | 1.61322578  | 1.05816227  |
| C | -2.08274591 | 3.37220751  | -4.08618941 |
| H | -2.02101657 | 4.46449332  | -4.18266074 |
| H | -1.25352247 | 2.94957589  | -4.66207940 |

|    |             |             |             |
|----|-------------|-------------|-------------|
| H  | -3.01870683 | 3.05881841  | -4.56102310 |
| C  | -2.37945219 | 1.71209265  | 4.89752726  |
| H  | -2.82325822 | 2.62892296  | 4.48880241  |
| H  | -3.04103800 | 1.36654310  | 5.70074729  |
| H  | -1.41915289 | 1.98416181  | 5.34541318  |
| C  | -4.39036194 | -1.71190930 | 1.76459947  |
| H  | -4.63770011 | -2.56816411 | 2.40676722  |
| H  | -5.27792022 | -1.07039968 | 1.72917878  |
| H  | -4.20492343 | -2.09684841 | 0.75843256  |
| C  | 5.02696488  | 0.05539181  | 0.08852301  |
| N  | 2.82323130  | 0.08703494  | 0.12503137  |
| O  | 5.25605663  | -1.03770410 | 0.49017804  |
| O  | 5.27571373  | 1.13942734  | -0.32499985 |
| Ta | 1.09170909  | 0.03935081  | 0.04389552  |

TS\_TaN03

O 1

|   |             |             |             |
|---|-------------|-------------|-------------|
| C | 0.72878633  | 1.39927595  | 1.83089510  |
| C | 1.42774959  | 0.73895798  | 2.85959037  |
| C | 1.37916801  | 2.42731949  | 1.13942935  |
| C | 2.72752146  | 1.10103460  | 3.21079521  |
| H | 0.93417437  | -0.06361964 | 3.39410547  |
| C | 2.68413640  | 2.82310454  | 1.48061513  |
| H | 0.85738429  | 2.93245994  | 0.33426797  |
| C | 3.34259097  | 2.15269109  | 2.51247205  |
| H | 4.35062288  | 2.45728249  | 2.78760171  |
| C | 0.35818820  | 1.02227706  | -1.99422955 |
| C | 1.74103839  | 0.87864516  | -2.17599717 |
| C | -0.21793555 | 2.29596468  | -2.14519865 |
| C | 2.53840607  | 1.97051593  | -2.54092627 |
| H | 2.18994546  | -0.09860782 | -2.04373717 |
| C | 0.55862454  | 3.40284651  | -2.50300549 |
| H | -1.28455585 | 2.40522950  | -1.98620323 |
| C | 1.93202042  | 3.22035638  | -2.71183813 |
| H | 2.54089252  | 4.06967045  | -3.01642870 |
| C | 1.44152190  | -2.13341357 | 0.07017222  |
| C | 2.60999876  | -1.42097287 | 0.38026381  |
| C | 1.51631660  | -3.13141634 | -0.91374758 |
| C | 3.82488158  | -1.69446776 | -0.25779318 |
| H | 2.56464758  | -0.65343694 | 1.14217250  |

|   |             |             |             |
|---|-------------|-------------|-------------|
| C | 2.72004480  | -3.42943261 | -1.56639862 |
| H | 0.62121217  | -3.68359732 | -1.17660401 |
| C | 3.86591215  | -2.70143399 | -1.23014487 |
| H | 4.80616481  | -2.92585724 | -1.73002398 |
| C | -1.61955210 | 1.95604628  | 2.37836554  |
| C | -1.87718430 | 3.27965752  | 1.62931289  |
| C | -2.94958862 | 1.22454406  | 2.62603131  |
| C | -1.04648916 | 2.29023920  | 3.77423966  |
| H | -0.95275168 | 3.85516574  | 1.52756991  |
| H | -2.28102208 | 3.08956711  | 0.63363326  |
| H | -2.59144115 | 3.89724534  | 2.18659606  |
| H | -2.78719400 | 0.27174519  | 3.13648872  |
| H | -3.58677769 | 1.84518214  | 3.26397709  |
| H | -3.49879730 | 1.03375787  | 1.70784299  |
| H | -1.78783605 | 2.88379723  | 4.31856284  |
| H | -0.85009095 | 1.38541575  | 4.35642289  |
| H | -0.12564608 | 2.87389534  | 3.72435356  |
| C | -0.96995187 | -0.83940378 | -2.95701285 |
| C | -1.81969656 | 0.10407418  | -3.83446256 |
| C | 0.21653058  | -1.35077714 | -3.80100616 |
| C | -1.84008020 | -2.04251784 | -2.55927016 |
| H | -2.67071233 | 0.50289397  | -3.27777419 |
| H | -1.23282640 | 0.94478707  | -4.21160872 |
| H | -2.20499653 | -0.44927963 | -4.69761068 |
| H | 0.85610891  | -2.01475095 | -3.21648984 |
| H | -0.16661527 | -1.90511719 | -4.66468462 |
| H | 0.82756215  | -0.52861799 | -4.17989213 |
| H | -2.09342766 | -2.61543774 | -3.45652014 |
| H | -1.31963664 | -2.71104901 | -1.86938756 |
| H | -2.77392032 | -1.72998721 | -2.08964355 |
| C | -0.10801841 | -2.93740482 | 1.84398615  |
| C | -0.87615684 | -4.11800294 | 1.21549700  |
| C | 1.18975316  | -3.45868588 | 2.49741045  |
| C | -0.97720397 | -2.34654220 | 2.97251520  |
| H | -1.77640182 | -3.75784041 | 0.71180858  |
| H | -0.25745775 | -4.66865789 | 0.50249405  |
| H | -1.18202903 | -4.82393135 | 1.99598573  |
| H | 1.76007779  | -2.64422008 | 2.95447922  |
| H | 0.92714363  | -4.17308340 | 3.28411338  |
| H | 1.83987145  | -3.97064115 | 1.78526205  |
| H | -1.09934927 | -3.10034143 | 3.75738184  |
| H | -0.50906425 | -1.46843202 | 3.42360710  |
| H | -1.96973880 | -2.07359937 | 2.61714932  |
| N | 0.21499699  | -1.87753726 | 0.78531344  |

|    |             |             |             |
|----|-------------|-------------|-------------|
| N  | -0.47123288 | -0.12693905 | -1.71318834 |
| N  | -0.65924969 | 1.08516113  | 1.56931929  |
| C  | 2.76535642  | -4.50806358 | -2.62536643 |
| H  | 3.79211724  | -4.71655424 | -2.93865680 |
| H  | 2.32770740  | -5.44400774 | -2.26134635 |
| H  | 2.19945412  | -4.21631544 | -3.51865143 |
| C  | 5.07989866  | -0.94188949 | 0.12383618  |
| H  | 5.70653389  | -1.53568993 | 0.80156437  |
| H  | 5.69133163  | -0.70907613 | -0.75440057 |
| H  | 4.84131101  | -0.00393395 | 0.63285127  |
| C  | 3.34244588  | 3.97970275  | 0.76409977  |
| H  | 3.30234978  | 3.84815606  | -0.32117914 |
| H  | 2.83352764  | 4.92459973  | 0.99074955  |
| H  | 4.38931636  | 4.08992031  | 1.06114383  |
| C  | 3.46611593  | 0.38077694  | 4.31588592  |
| H  | 4.30616200  | -0.20250237 | 3.91965947  |
| H  | 3.88143676  | 1.08647882  | 5.04395214  |
| H  | 2.80889281  | -0.30828521 | 4.85322391  |
| C  | -0.06889609 | 4.77104374  | -2.64722185 |
| H  | -0.01265254 | 5.33543305  | -1.70780687 |
| H  | 0.43922621  | 5.36603691  | -3.41251512 |
| H  | -1.12614483 | 4.70005327  | -2.91928097 |
| C  | 4.02795291  | 1.79904535  | -2.73343825 |
| H  | 4.26405366  | 0.82412683  | -3.17053360 |
| H  | 4.43901012  | 2.57439517  | -3.38697429 |
| H  | 4.55977860  | 1.86011413  | -1.77588286 |
| C  | -3.94840809 | -1.32675119 | 0.48468387  |
| N  | -2.64086796 | -1.27253366 | 0.48009944  |
| O  | -4.77065588 | -2.03542236 | 0.99963306  |
| C  | -4.01352859 | 0.84194020  | -0.82136900 |
| O  | -4.61863145 | -0.24644516 | -0.39268704 |
| C  | -4.95102314 | 1.75984120  | -1.56967313 |
| H  | -5.54633109 | 2.32093347  | -0.84090174 |
| H  | -4.38195218 | 2.46424790  | -2.17699155 |
| H  | -5.64268760 | 1.18293767  | -2.18675541 |
| O  | -2.82923363 | 1.14987895  | -0.63280176 |
| Ta | -1.03713418 | -0.38441858 | 0.21045917  |

VN1

|   |             |            |             |
|---|-------------|------------|-------------|
| N | -0.19699898 | 0.05718702 | -3.14492833 |
|---|-------------|------------|-------------|

|   |             |             |             |
|---|-------------|-------------|-------------|
| C | -2.27131732 | 0.37177851  | 0.28258079  |
| C | -3.21832809 | -0.67471980 | 0.38725010  |
| C | -1.81525847 | 0.95030906  | 1.47764972  |
| C | -3.70663403 | -1.10943659 | 1.61886231  |
| H | -3.55611795 | -1.15736622 | -0.52401583 |
| C | -2.28311042 | 0.52569128  | 2.73017193  |
| H | -1.09188765 | 1.75633531  | 1.41415748  |
| C | -3.23201720 | -0.49725905 | 2.79082023  |
| H | -3.60899716 | -0.82423888 | 3.75924340  |
| C | 1.47586157  | 1.78779063  | 0.08306643  |
| C | 1.93767977  | 1.14326107  | 1.24349073  |
| C | 1.01051115  | 3.11478164  | 0.21847902  |
| C | 1.95722955  | 1.78728651  | 2.48802463  |
| H | 2.29498509  | 0.12249307  | 1.15476205  |
| C | 1.01746794  | 3.77912608  | 1.44653891  |
| H | 0.61677101  | 3.61474930  | -0.66068221 |
| C | 1.49680414  | 3.10452651  | 2.57916021  |
| H | 1.50884597  | 3.61314885  | 3.54260713  |
| C | 0.82024365  | -2.15646787 | 0.05591963  |
| C | 0.17321658  | -2.16446367 | 1.30777472  |
| C | 2.19890285  | -2.45009050 | 0.03675076  |
| C | 0.85624669  | -2.47055713 | 2.48881492  |
| H | -0.88808157 | -1.94188295 | 1.33625162  |
| C | 2.90456096  | -2.76823597 | 1.20230696  |
| H | 2.72105890  | -2.41394164 | -0.91442832 |
| C | 2.22209788  | -2.78050478 | 2.42411104  |
| H | 2.76000198  | -3.03543337 | 3.33646721  |
| C | -2.78247765 | 1.60008282  | -1.80865776 |
| C | -3.83218696 | 2.32403884  | -0.93439294 |
| C | -2.01390689 | 2.68484687  | -2.58887414 |
| C | -3.51179742 | 0.69109622  | -2.82349558 |
| H | -4.47144183 | 1.62523377  | -0.38771270 |
| H | -3.34713813 | 2.97833226  | -0.20243107 |
| H | -4.47590917 | 2.94191151  | -1.57157920 |
| H | -1.25462468 | 2.22562286  | -3.22236003 |
| H | -2.70069609 | 3.26718753  | -3.21753538 |
| H | -1.51871206 | 3.37008228  | -1.89278528 |
| H | -4.16461663 | 1.28159188  | -3.48089782 |
| H | -2.77341920 | 0.16984320  | -3.43683645 |
| H | -4.13760727 | -0.05131086 | -2.31749832 |
| C | 2.55242877  | 1.56698124  | -2.13611564 |
| C | 2.01630445  | 2.62438686  | -3.12696906 |
| C | 3.78777368  | 2.14469486  | -1.40747973 |
| C | 3.02836218  | 0.33847203  | -2.93594231 |

|   |              |              |              |
|---|--------------|--------------|--------------|
| H | 1. 14970351  | 2. 21948642  | -3. 65420900 |
| H | 1. 71447116  | 3. 53875801  | -2. 60530531 |
| H | 2. 78324244  | 2. 89924787  | -3. 86418918 |
| H | 4. 18912790  | 1. 42599215  | -0. 68532945 |
| H | 4. 57234370  | 2. 36619488  | -2. 14052984 |
| H | 3. 55979839  | 3. 06892404  | -0. 86929398 |
| H | 3. 80684117  | 0. 62522006  | -3. 65552244 |
| H | 3. 44452241  | -0. 41511270 | -2. 25889601 |
| H | 2. 19178226  | -0. 10572141 | -3. 47591423 |
| C | -0. 15242312 | -3. 04379887 | -2. 04248828 |
| C | 0. 90274402  | -3. 13034792 | -3. 16778231 |
| C | -0. 17275975 | -4. 38394174 | -1. 27152381 |
| C | -1. 54265626 | -2. 86832945 | -2. 68512442 |
| H | 0. 91784676  | -2. 19021001 | -3. 72322065 |
| H | 1. 90282314  | -3. 31545852 | -2. 76171520 |
| H | 0. 66968125  | -3. 94900826 | -3. 86233412 |
| H | -0. 90191483 | -4. 35592469 | -0. 45508777 |
| H | -0. 45661353 | -5. 19288708 | -1. 95490661 |
| H | 0. 80172339  | -4. 63333334 | -0. 84263067 |
| H | -1. 76533402 | -3. 70594678 | -3. 35961921 |
| H | -2. 31415434 | -2. 83453843 | -1. 90878439 |
| H | -1. 57990551 | -1. 93735356 | -3. 25130175 |
| N | 0. 09292854  | -1. 87731642 | -1. 13153856 |
| N | 1. 49190180  | 1. 12412420  | -1. 17310146 |
| N | -1. 79948238 | 0. 83475130  | -0. 97387144 |
| C | 4. 38237918  | -3. 08953759 | 1. 13546109  |
| H | 4. 79563224  | -3. 28036618 | 2. 13117324  |
| H | 4. 57430046  | -3. 97684279 | 0. 51936232  |
| H | 4. 95083000  | -2. 26429850 | 0. 69052182  |
| C | 0. 13669560  | -2. 46747792 | 3. 82010900  |
| H | 0. 45273085  | -3. 30798671 | 4. 44964932  |
| H | 0. 34249334  | -1. 54832662 | 4. 38381376  |
| H | -0. 94649846 | -2. 52471428 | 3. 68467798  |
| C | -1. 76208759 | 1. 17505787  | 3. 99290484  |
| H | -0. 72016244 | 0. 89152921  | 4. 18158997  |
| H | -1. 77949691 | 2. 26790792  | 3. 91646149  |
| H | -2. 35466657 | 0. 88525995  | 4. 86719098  |
| C | -4. 72351379 | -2. 22754194 | 1. 70034064  |
| H | -4. 34116153 | -3. 07934272 | 2. 27643395  |
| H | -5. 64693795 | -1. 89778803 | 2. 19360855  |
| H | -4. 98993768 | -2. 59425836 | 0. 70477566  |
| C | 0. 48727349  | 5. 19194307  | 1. 56580247  |
| H | -0. 47194360 | 5. 21763896  | 2. 09873648  |
| H | 1. 17923335  | 5. 83688649  | 2. 12101233  |



|     |             |             |             |
|-----|-------------|-------------|-------------|
| H   | 0.32639537  | 5.64049172  | 0.58099725  |
| C   | 2.51896477  | 1.08068399  | 3.70296395  |
| H   | 3.59360979  | 1.27852935  | 3.81788893  |
| H   | 2.03090261  | 1.41537916  | 4.62528392  |
| H   | 2.39742807  | -0.00297615 | 3.61901828  |
| V   | -0.09953201 | 0.03463553  | -1.58204820 |
|     |             |             |             |
| VN2 |             |             |             |
| C   | 0.37556000  | -2.19192800 | -0.60463800 |
| C   | 0.30817100  | -2.58419200 | -1.95950600 |
| C   | 1.63835600  | -2.16047200 | 0.00414500  |
| C   | 1.44742000  | -2.95145300 | -2.67528800 |
| H   | -0.65762700 | -2.58110300 | -2.45130300 |
| C   | 2.80149600  | -2.51789200 | -0.69458800 |
| H   | 1.70272000  | -1.86059700 | 1.04438500  |
| C   | 2.69381000  | -2.91678100 | -2.02832100 |
| H   | 3.59030600  | -3.20522600 | -2.57577800 |
| C   | 0.61507500  | 0.56853300  | 2.16822200  |
| C   | 1.79941900  | 1.16887700  | 1.71182400  |
| C   | 0.72273200  | -0.42447300 | 3.16307900  |
| C   | 3.05160200  | 0.81114500  | 2.22909700  |
| H   | 1.72732300  | 1.93518800  | 0.94751100  |
| C   | 1.95844600  | -0.80253700 | 3.69343400  |
| H   | -0.18131500 | -0.91477800 | 3.50768400  |
| C   | 3.11895300  | -0.17490900 | 3.21823500  |
| H   | 4.08765700  | -0.46043200 | 3.62648400  |
| C   | 0.37031500  | 1.60800400  | -1.61357800 |
| C   | 1.55820000  | 0.96139100  | -2.00306100 |
| C   | 0.44060000  | 2.97536000  | -1.29313100 |
| C   | 2.77333600  | 1.64731800  | -2.08717600 |
| H   | 1.51179200  | -0.09299700 | -2.25178300 |
| C   | 1.64270800  | 3.68804800  | -1.37590800 |
| H   | -0.46184800 | 3.47828700  | -0.96284100 |
| C   | 2.80174500  | 3.01419400  | -1.77696100 |
| H   | 3.74026900  | 3.56229800  | -1.84943200 |
| C   | -1.61664900 | -3.03518500 | 0.60518000  |
| C   | -0.69113000 | -4.20468800 | 1.01387500  |
| C   | -2.43215700 | -2.63466500 | 1.84789400  |
| C   | -2.60264400 | -3.51824700 | -0.48073900 |
| H   | -0.12127500 | -4.59886500 | 0.16801500  |

|   |             |             |             |
|---|-------------|-------------|-------------|
| H | 0.02034200  | -3.89447200 | 1.78666000  |
| H | -1.29939700 | -5.02113500 | 1.41847900  |
| H | -3.19145500 | -1.89600600 | 1.59608800  |
| H | -2.94095600 | -3.51838700 | 2.25143500  |
| H | -1.78009900 | -2.22982800 | 2.62738000  |
| H | -3.17660700 | -4.37635700 | -0.10669600 |
| H | -3.31017800 | -2.72200200 | -0.72639500 |
| H | -2.07786500 | -3.84764000 | -1.38302900 |
| C | -1.44838300 | 1.90221100  | 2.54204300  |
| C | -2.42338700 | 1.10556600  | 3.43408700  |
| C | -0.51776000 | 2.74513000  | 3.44395800  |
| C | -2.25751400 | 2.88187400  | 1.67186200  |
| H | -3.10346900 | 0.51954000  | 2.81386500  |
| H | -1.88668800 | 0.43233700  | 4.11091100  |
| H | -3.02395000 | 1.78774400  | 4.04870000  |
| H | 0.18752800  | 3.33137300  | 2.84577000  |
| H | -1.12646600 | 3.44198400  | 4.03016100  |
| H | 0.05931400  | 2.13313300  | 4.14261800  |
| H | -2.75942300 | 3.61455700  | 2.31668700  |
| H | -1.58877700 | 3.42736700  | 0.99880200  |
| H | -3.02864900 | 2.37250200  | 1.09016700  |
| C | -1.80229800 | 1.13875100  | -2.72872000 |
| C | -2.79119300 | 2.28076300  | -2.40819100 |
| C | -1.01936800 | 1.50135900  | -4.01185100 |
| C | -2.59239500 | -0.14867500 | -3.03275400 |
| H | -3.38568500 | 2.05289000  | -1.52080000 |
| H | -2.26209500 | 3.22508900  | -2.24302800 |
| H | -3.47820700 | 2.43315800  | -3.25065400 |
| H | -0.29562200 | 0.72092300  | -4.26833600 |
| H | -1.72382400 | 1.59940500  | -4.84507000 |
| H | -0.47796900 | 2.44653400  | -3.91710700 |
| H | -3.26556000 | 0.02337000  | -3.88135800 |
| H | -1.90592800 | -0.95649800 | -3.30441400 |
| H | -3.19628800 | -0.47647600 | -2.18680900 |
| N | -0.86121700 | 0.88674200  | -1.57639400 |
| N | -0.65086000 | 0.98038400  | 1.65213900  |
| N | -0.80014600 | -1.85763000 | 0.13635900  |
| C | 1.67914500  | 5.16188800  | -1.03446300 |
| H | 2.69712300  | 5.56011000  | -1.09062900 |
| H | 1.05355200  | 5.74807000  | -1.71869600 |
| H | 1.30203500  | 5.34644200  | -0.02193700 |
| C | 4.03858100  | 0.92973400  | -2.50405400 |
| H | 4.57151000  | 1.47824700  | -3.29019100 |
| H | 4.73338400  | 0.82179800  | -1.66136700 |

|     |             |             |             |
|-----|-------------|-------------|-------------|
| H   | 3.81854700  | -0.07475800 | -2.87460200 |
| C   | 4.14682600  | -2.46265000 | -0.00619900 |
| H   | 4.44414200  | -1.42724700 | 0.19671500  |
| H   | 4.12245100  | -2.97803400 | 0.96040400  |
| H   | 4.92908800  | -2.92444200 | -0.61740900 |
| C   | 1.34954900  | -3.38201100 | -4.12251300 |
| H   | 1.99899000  | -2.77753400 | -4.76713200 |
| H   | 1.65509000  | -4.42817700 | -4.25201000 |
| H   | 0.32638300  | -3.28636900 | -4.49648800 |
| C   | 2.04986100  | -1.89462900 | 4.73685400  |
| H   | 2.35512200  | -2.85015100 | 4.29108600  |
| H   | 2.78685800  | -1.65071700 | 5.51055000  |
| H   | 1.08597900  | -2.05848300 | 5.22768000  |
| C   | 4.30352900  | 1.51741400  | 1.75638800  |
| H   | 4.54881000  | 2.36962800  | 2.40458900  |
| H   | 5.17122000  | 0.84831200  | 1.76486500  |
| H   | 4.17659000  | 1.90725000  | 0.74252300  |
| C   | -4.38227300 | 0.08586300  | 0.12137200  |
| N   | -2.87770800 | 0.04968400  | 0.18707700  |
| O   | -4.85702100 | 1.19435600  | 0.41414200  |
| O   | -4.87847500 | -0.99708200 | -0.22658200 |
| V   | -1.26665800 | 0.01611000  | 0.09699500  |
| VNO |             |             |             |
| C   | -0.86987000 | -1.28782500 | 1.79968200  |
| C   | -1.19343300 | -0.74659900 | 3.05808800  |
| C   | -1.86338400 | -1.96951800 | 1.08780300  |
| C   | -2.47228500 | -0.88361600 | 3.60103100  |
| H   | -0.43138000 | -0.21522600 | 3.61631100  |
| C   | -3.15726200 | -2.12007400 | 1.60942900  |
| H   | -1.61503400 | -2.40266800 | 0.12600200  |
| C   | -3.44565500 | -1.57583700 | 2.86340200  |
| H   | -4.44325400 | -1.69792200 | 3.28143900  |
| C   | -0.33007300 | -1.04930200 | -1.97977200 |
| C   | -1.66782200 | -0.69534700 | -2.20883700 |
| C   | 0.05057900  | -2.39035500 | -2.14561000 |
| C   | -2.60977900 | -1.64893200 | -2.61343200 |
| H   | -1.96697300 | 0.33852400  | -2.08231500 |
| C   | -0.87500600 | -3.36571500 | -2.53133600 |
| H   | 1.08216200  | -2.66906000 | -1.96472400 |

|   |             |             |             |
|---|-------------|-------------|-------------|
| C | -2.20107000 | -2.97879700 | -2.76530300 |
| H | -2.92647100 | -3.72745700 | -3.07819600 |
| C | -1.28481000 | 2.10516400  | 0.04755800  |
| C | -2.50831700 | 1.59243400  | 0.50398100  |
| C | -1.28468300 | 2.93609300  | -1.08490200 |
| C | -3.71225800 | 1.90938000  | -0.13652800 |
| H | -2.51488200 | 0.95648900  | 1.38108700  |
| C | -2.47255000 | 3.25744800  | -1.75121600 |
| H | -0.34399200 | 3.32789500  | -1.45397200 |
| C | -3.67885200 | 2.73864200  | -1.26388600 |
| H | -4.60924800 | 2.99198500  | -1.76857400 |
| C | 1.44202000  | -2.21877700 | 1.85830800  |
| C | 0.70445200  | -3.48455400 | 2.34769100  |
| C | 2.43427300  | -2.66523400 | 0.77065000  |
| C | 2.20939000  | -1.60360300 | 3.04543000  |
| H | 0.03739000  | -3.28164000 | 3.18823900  |
| H | 0.11596100  | -3.93945900 | 1.54620100  |
| H | 1.45016600  | -4.21496800 | 2.67737300  |
| H | 2.96470000  | -1.81745500 | 0.34086000  |
| H | 3.17318200  | -3.34714700 | 1.20601700  |
| H | 1.91172000  | -3.19905100 | -0.02687200 |
| H | 2.90729300  | -2.33814400 | 3.46302900  |
| H | 2.78320400  | -0.73173700 | 2.72873300  |
| H | 1.52626200  | -1.30440800 | 3.84514000  |
| C | 1.40337300  | 0.53273100  | -2.80476500 |
| C | 2.40466700  | -0.50390000 | -3.35335700 |
| C | 0.41755600  | 0.92736900  | -3.92771100 |
| C | 2.18700300  | 1.79272200  | -2.39713300 |
| H | 3.10994600  | -0.81128900 | -2.57703000 |
| H | 1.89875100  | -1.38641500 | -3.75284600 |
| H | 2.98382200  | -0.05401700 | -4.16699300 |
| H | -0.30349500 | 1.67028100  | -3.57541500 |
| H | 0.98323700  | 1.36508000  | -4.75627600 |
| H | -0.13470300 | 0.06914200  | -4.31571800 |
| H | 2.51112300  | 2.31393900  | -3.30334600 |
| H | 1.57466400  | 2.48237300  | -1.81319800 |
| H | 3.08255700  | 1.55592900  | -1.82681300 |
| C | 0.34825700  | 2.90571100  | 1.74729800  |
| C | 1.14836300  | 4.00362400  | 1.01636500  |
| C | -0.89129700 | 3.53882500  | 2.41653000  |
| C | 1.22103400  | 2.31515200  | 2.86726900  |
| H | 2.05156700  | 3.59122700  | 0.56130800  |
| H | 0.54371500  | 4.49313700  | 0.24808800  |
| H | 1.45364000  | 4.77462600  | 1.73302700  |

|   |             |             |             |
|---|-------------|-------------|-------------|
| H | -1.49198200 | 2.78564600  | 2.93476700  |
| H | -0.55472200 | 4.27279500  | 3.15549800  |
| H | -1.53304300 | 4.05560200  | 1.69993000  |
| H | 1.46471200  | 3.10481800  | 3.58526600  |
| H | 0.69227100  | 1.52467200  | 3.40467200  |
| H | 2.15845300  | 1.91545600  | 2.48729600  |
| N | -0.07259600 | 1.81968100  | 0.77178200  |
| N | 0.63152500  | -0.03851200 | -1.62638700 |
| N | 0.46540400  | -1.21074800 | 1.27382700  |
| C | -2.44812400 | 4.12930500  | -2.98646700 |
| H | -3.40268800 | 4.64411900  | -3.13072500 |
| H | -1.66026200 | 4.88634500  | -2.92680000 |
| H | -2.25826700 | 3.53549600  | -3.88954400 |
| C | -5.02798300 | 1.40207800  | 0.40964000  |
| H | -5.50963800 | 2.15977400  | 1.04082800  |
| H | -5.73216400 | 1.16018600  | -0.39324700 |
| H | -4.88424700 | 0.50883200  | 1.02326600  |
| C | -4.22068400 | -2.84635200 | 0.81779300  |
| H | -4.71963200 | -2.16876400 | 0.11431300  |
| H | -3.79135800 | -3.66078700 | 0.22721800  |
| H | -4.99083000 | -3.26526800 | 1.47260000  |
| C | -2.80634100 | -0.31033600 | 4.95961800  |
| H | -3.64408200 | 0.39391800  | 4.90090000  |
| H | -3.09958600 | -1.09838600 | 5.66311600  |
| H | -1.95334800 | 0.22061300  | 5.39082900  |
| C | -0.45614700 | -4.81219400 | -2.66921000 |
| H | -0.58134600 | -5.35494400 | -1.72376100 |
| H | -1.05573600 | -5.33199800 | -3.42272600 |
| H | 0.59635100  | -4.89867400 | -2.95534100 |
| C | -4.03171400 | -1.23735400 | -2.92038100 |
| H | -4.15536500 | -1.01622000 | -3.98823200 |
| H | -4.74318500 | -2.03123100 | -2.67175700 |
| H | -4.31167800 | -0.33621700 | -2.36799400 |
| C | 3.79125200  | 1.06406400  | 0.59801100  |
| N | 2.52724800  | 0.61560000  | 0.46525600  |
| O | 4.18160300  | 2.20822900  | 0.62162800  |
| C | 5.59414100  | -0.27854600 | -0.20109400 |
| O | 4.71646200  | -0.00028400 | 0.81287700  |
| C | 6.64849300  | -1.24761300 | 0.26988200  |
| H | 6.17775800  | -2.13746000 | 0.69712000  |
| H | 7.28808100  | -1.52379500 | -0.56779000 |
| H | 7.24732200  | -0.78288800 | 1.05901100  |
| O | 5.49851600  | 0.18758200  | -1.31011800 |
| V | 0.89505000  | 0.29553300  | 0.20813800  |

VN3

|   |             |             |             |
|---|-------------|-------------|-------------|
| C | 0.61169500  | 1.11400000  | 1.87021100  |
| C | 1.35185000  | 0.40832100  | 2.83581800  |
| C | 1.19913800  | 2.23958300  | 1.27805600  |
| C | 2.63845600  | 0.80123700  | 3.20420600  |
| H | 0.91179000  | -0.45319800 | 3.31647500  |
| C | 2.48403400  | 2.67122000  | 1.64712200  |
| H | 0.64328600  | 2.79554200  | 0.53376400  |
| C | 3.19454300  | 1.93770800  | 2.59875400  |
| H | 4.19224500  | 2.26283300  | 2.88792300  |
| C | 0.10092700  | 1.26226300  | -1.72908800 |
| C | 1.46431500  | 1.33482100  | -2.03950900 |
| C | -0.66613500 | 2.43902100  | -1.72569300 |
| C | 2.05914900  | 2.55851100  | -2.37458800 |
| H | 2.06088000  | 0.43183100  | -2.01917300 |
| C | -0.09318900 | 3.66968400  | -2.05644300 |
| H | -1.71277900 | 2.36903200  | -1.46029500 |
| C | 1.26928000  | 3.71246200  | -2.38448600 |
| H | 1.72236900  | 4.66502400  | -2.65170400 |
| C | 1.23856800  | -2.10209700 | -0.19302700 |
| C | 2.37614200  | -1.28923200 | -0.05645400 |
| C | 1.31250400  | -3.20201600 | -1.06332000 |
| C | 3.56125800  | -1.56952100 | -0.74355400 |
| H | 2.33748600  | -0.44948500 | 0.62426500  |
| C | 2.48464700  | -3.49772700 | -1.77238300 |
| H | 0.44672400  | -3.83616800 | -1.20362700 |
| C | 3.60338900  | -2.67849600 | -1.59854200 |
| H | 4.52268400  | -2.90917600 | -2.13321300 |
| C | -1.75243000 | 1.54487900  | 2.48587400  |
| C | -2.10096300 | 2.89860200  | 1.83688800  |
| C | -3.02664200 | 0.72185400  | 2.74661800  |
| C | -1.13575700 | 1.82628800  | 3.87695200  |
| H | -1.21234700 | 3.53051300  | 1.75362500  |
| H | -2.52893900 | 2.74771500  | 0.84804800  |
| H | -2.82832300 | 3.42892300  | 2.46227900  |
| H | -2.78923400 | -0.21236600 | 3.26107700  |
| H | -3.68858200 | 1.30221600  | 3.39735400  |
| H | -3.56203900 | 0.48921700  | 1.83250100  |
| H | -1.89580500 | 2.33164700  | 4.48086400  |

|   |             |             |             |
|---|-------------|-------------|-------------|
| H | -0.85848100 | 0.90554300  | 4.39713900  |
| H | -0.26014500 | 2.47576900  | 3.83101800  |
| C | -0.96649200 | -0.70432600 | -2.79886700 |
| C | -1.87348400 | 0.21681400  | -3.64480200 |
| C | 0.28007900  | -1.05457900 | -3.64273800 |
| C | -1.75546300 | -1.98583000 | -2.48788800 |
| H | -2.79833800 | 0.45516100  | -3.12075000 |
| H | -1.36668200 | 1.13779800  | -3.94032700 |
| H | -2.14235600 | -0.32465800 | -4.55783600 |
| H | 0.99108200  | -1.66338800 | -3.08468100 |
| H | -0.05237900 | -1.62629200 | -4.51509500 |
| H | 0.78877500  | -0.16076500 | -4.00944800 |
| H | -1.93363800 | -2.51788100 | -3.42771200 |
| H | -1.20498700 | -2.65498700 | -1.82736700 |
| H | -2.72492800 | -1.74693100 | -2.04942900 |
| C | -0.04616100 | -2.91791800 | 1.73223800  |
| C | -0.67421100 | -4.22749400 | 1.19311800  |
| C | 1.34914600  | -3.26502900 | 2.31154500  |
| C | -0.92079200 | -2.43490900 | 2.91151600  |
| H | -1.57047900 | -4.02296900 | 0.60673100  |
| H | 0.02828500  | -4.80424000 | 0.58907700  |
| H | -0.96215700 | -4.85737100 | 2.04213900  |
| H | 1.84994900  | -2.38499700 | 2.72138200  |
| H | 1.21717500  | -3.98993600 | 3.12092200  |
| H | 2.00959100  | -3.71365300 | 1.56830700  |
| H | -0.71928200 | -3.07152700 | 3.77882600  |
| H | -0.70726800 | -1.40501400 | 3.18980500  |
| H | -1.98184200 | -2.50055400 | 2.68721200  |
| N | 0.08535100  | -1.85482900 | 0.63262300  |
| N | -0.54069700 | -0.00848000 | -1.50499600 |
| N | -0.76436600 | 0.78693400  | 1.57968400  |
| C | 2.51949800  | -4.66734600 | -2.72976200 |
| H | 3.54415100  | -5.00474200 | -2.91085900 |
| H | 1.94516000  | -5.51689600 | -2.34725600 |
| H | 2.08708600  | -4.39663400 | -3.70119400 |
| C | 4.78822300  | -0.70764600 | -0.54564800 |
| H | 5.60513500  | -1.28111700 | -0.09143400 |
| H | 5.16410300  | -0.32033600 | -1.49974200 |
| H | 4.57558100  | 0.14371300  | 0.10648300  |
| C | 3.06520400  | 3.93824300  | 1.06234600  |
| H | 2.72841100  | 4.09432300  | 0.03482200  |
| H | 2.75401700  | 4.81496200  | 1.64464300  |
| H | 4.15927500  | 3.91721600  | 1.07051300  |
| C | 3.41560300  | 0.03532800  | 4.25095400  |

|   |             |             |             |
|---|-------------|-------------|-------------|
| H | 4.36260700  | -0.34213300 | 3.84835700  |
| H | 3.66314600  | 0.67315200  | 5.10739700  |
| H | 2.84809900  | -0.82047400 | 4.62606100  |
| C | -0.93829400 | 4.92274800  | -2.09552400 |
| H | -0.33936000 | 5.81639100  | -1.89543600 |
| H | -1.40252100 | 5.05592000  | -3.08070300 |
| H | -1.74604200 | 4.88248300  | -1.35894100 |
| C | 3.53012500  | 2.61737400  | -2.71942300 |
| H | 3.76893000  | 1.95340800  | -3.55791500 |
| H | 3.83462800  | 3.62999700  | -2.99814800 |
| H | 4.15050400  | 2.30169700  | -1.87298400 |
| C | -3.65926300 | -2.20937600 | 0.58106800  |
| N | -2.56881200 | -1.69015400 | 0.59121400  |
| O | -4.68849100 | -2.79138300 | 0.64024800  |
| C | -3.98744200 | 0.61027600  | -0.80686500 |
| O | -4.38833400 | -0.37558800 | -1.42164600 |
| C | -4.88043700 | 1.83771700  | -0.64313900 |
| H | -5.07072800 | 2.02934000  | 0.41762900  |
| H | -4.38885200 | 2.72811400  | -1.04897500 |
| H | -5.82701300 | 1.67488100  | -1.15961000 |
| O | -2.80447600 | 0.74341000  | -0.25642400 |
| V | -1.19962000 | -0.44064200 | 0.19656000  |

TS\_VN12

|   |             |             |             |
|---|-------------|-------------|-------------|
| C | -0.49286960 | 2.21981932  | -0.51647960 |
| C | -0.48563346 | 2.64013062  | -1.86378702 |
| C | -1.73569720 | 2.14389640  | 0.13360071  |
| C | -1.65966912 | 2.99497299  | -2.53191162 |
| H | 0.46094937  | 2.66078526  | -2.39271326 |
| C | -2.92971939 | 2.48957697  | -0.51361046 |
| H | -1.75586945 | 1.80979465  | 1.16537325  |
| C | -2.87996136 | 2.91593179  | -1.84462510 |
| H | -3.80258368 | 3.18524782  | -2.35750474 |
| C | -0.57885951 | -0.67396311 | 2.17116979  |
| C | -1.75072247 | -1.29355818 | 1.70605428  |
| C | -0.70923808 | 0.27897280  | 3.20329473  |
| C | -3.00736150 | -0.99720415 | 2.25018335  |
| H | -1.66276232 | -2.02867927 | 0.91297552  |
| C | -1.94952229 | 0.59505538  | 3.76287682  |
| H | 0.18308656  | 0.78783667  | 3.55257128  |
| C | -3.09492711 | -0.05386878 | 3.27956399  |



|   |             |             |             |
|---|-------------|-------------|-------------|
| H | -4.06662842 | 0.18007020  | 3.71279643  |
| C | -0.37207942 | -1.56457819 | -1.68643140 |
| C | -1.57779869 | -0.93829907 | -2.04500844 |
| C | -0.41413572 | -2.94355989 | -1.39338750 |
| C | -2.78130687 | -1.65001909 | -2.12984624 |
| H | -1.55990532 | 0.12418698  | -2.26320238 |
| C | -1.59962746 | -3.67870712 | -1.47402893 |
| H | 0.50084964  | -3.43230783 | -1.07604512 |
| C | -2.78071090 | -3.01964639 | -1.84333905 |
| H | -3.71173128 | -3.58203032 | -1.90358561 |
| C | 1.53130121  | 3.07550442  | 0.61653796  |
| C | 0.62948490  | 4.28092332  | 0.97104174  |
| C | 2.30728736  | 2.69591307  | 1.89107869  |
| C | 2.54264016  | 3.50921707  | -0.46710280 |
| H | 0.09559265  | 4.67025935  | 0.09971022  |
| H | -0.11303774 | 4.00804252  | 1.72820303  |
| H | 1.24784648  | 5.09023373  | 1.37595516  |
| H | 2.97415047  | 1.85639608  | 1.69857206  |
| H | 2.90490513  | 3.54842177  | 2.23691416  |
| H | 1.61359363  | 2.41471436  | 2.68972831  |
| H | 3.14894859  | 4.35328902  | -0.11205852 |
| H | 3.21636102  | 2.68463493  | -0.70742265 |
| H | 2.03109030  | 3.83458541  | -1.37870418 |
| C | 1.54089783  | -1.91853247 | 2.48429253  |
| C | 2.51644972  | -1.10231727 | 3.35965330  |
| C | 0.67584982  | -2.81288737 | 3.40236383  |
| C | 2.35503901  | -2.85482282 | 1.57247182  |
| H | 3.14749317  | -0.47751727 | 2.72506453  |
| H | 1.97593512  | -0.45978522 | 4.06247991  |
| H | 3.16362400  | -1.76770166 | 3.94560716  |
| H | -0.03714243 | -3.40424242 | 2.81848113  |
| H | 1.32672332  | -3.50611146 | 3.94703869  |
| H | 0.11023193  | -2.23502431 | 4.13856309  |
| H | 2.96788266  | -3.53377998 | 2.17883079  |
| H | 1.68081569  | -3.45874217 | 0.95679965  |
| H | 3.01935446  | -2.28856184 | 0.92074708  |
| C | 1.78023655  | -1.04269142 | -2.79404780 |
| C | 2.80615034  | -2.15767994 | -2.49227664 |
| C | 1.01064630  | -1.41347561 | -4.08323880 |
| C | 2.53493643  | 0.26952960  | -3.08135729 |
| H | 3.37331407  | -1.92014937 | -1.59032292 |
| H | 2.30921994  | -3.12234947 | -2.34686759 |
| H | 3.51113224  | -2.27226306 | -3.32634030 |
| H | 0.26324225  | -0.65202271 | -4.32884959 |

|   |             |             |             |
|---|-------------|-------------|-------------|
| H | 1.71634294  | -1.48066628 | -4.91907590 |
| H | 0.49646586  | -2.37486735 | -3.99954837 |
| H | 3.22980683  | 0.13142613  | -3.91932646 |
| H | 1.82734849  | 1.05995181  | -3.35164867 |
| H | 3.10172971  | 0.59816830  | -2.21071429 |
| N | 0.84423684  | -0.82360612 | -1.63819800 |
| N | 0.69134656  | -1.02195258 | 1.62677840  |
| N | 0.71198290  | 1.89531570  | 0.17384876  |
| C | -1.60500231 | -5.16373830 | -1.18289386 |
| H | -0.82400710 | -5.43177993 | -0.46455339 |
| H | -2.56735256 | -5.48927123 | -0.77328082 |
| H | -1.42469798 | -5.75276626 | -2.09231273 |
| C | -4.05080390 | -0.95204182 | -2.56651300 |
| H | -4.16106030 | -0.97448862 | -3.65931800 |
| H | -4.94032302 | -1.43104860 | -2.14284758 |
| H | -4.04615736 | 0.09858544  | -2.26306354 |
| C | -4.24383693 | 2.43591460  | 0.23436476  |
| H | -4.24853490 | 1.61940573  | 0.96209647  |
| H | -4.42396341 | 3.36634734  | 0.78987156  |
| H | -5.08989661 | 2.29700212  | -0.44734713 |
| C | -1.61660695 | 3.46807390  | -3.96866005 |
| H | -0.71176697 | 3.11894073  | -4.47511903 |
| H | -2.48171294 | 3.10808006  | -4.53661987 |
| H | -1.62350804 | 4.56459173  | -4.03203576 |
| C | -2.06184574 | 1.65111716  | 4.84092894  |
| H | -2.90282093 | 1.45018819  | 5.51371604  |
| H | -1.15027336 | 1.70493739  | 5.44458258  |
| H | -2.22248631 | 2.64787434  | 4.40963311  |
| C | -4.23939007 | -1.72743607 | 1.76232304  |
| H | -4.36823516 | -2.68443873 | 2.28602408  |
| H | -5.14892556 | -1.14094952 | 1.93155240  |
| H | -4.16600899 | -1.95169505 | 0.69432167  |
| C | 4.85745822  | 0.02564369  | 0.06983132  |
| N | 2.83540238  | 0.04291946  | 0.14632049  |
| O | 5.15366839  | -1.08025727 | 0.41057368  |
| O | 5.14568156  | 1.12452305  | -0.29863040 |
| V | 1.25267237  | 0.02127757  | 0.07464824  |
